RESEARCH ARTICLE

# Unprecedented 2020 coral bleaching reveals unexpected taxa-specific responses in the central Red Sea

Natalie Dunn<sup>1,2\*</sup>, Fabio Marchese<sup>2</sup>, Catherine S. McFadden<sup>3</sup>, Laura Macrina<sup>1,2</sup>, Marta Ezeta Watts<sup>1,2</sup>, Megan K. B. Nolan<sup>1,2</sup>, Francesca Giovenzana<sup>1,2,4</sup>, Francesca Benzoni<sup>1,2</sup>

**1** Marine Science Program, Biological and Environmental Science and Engineering Division (BESE), King Abdullah University of Science and Technology (KAUST), Thuwal, Kingdom of Saudi Arabia, **2** KAUST Red Sea Research Center, King Abdullah University of Science and Technology (KAUST), Thuwal, Kingdom of Saudi Arabia, **3** Department of Biology, Harvey Mudd College, Claremont, California, United States of America, **4** KAUST Ali I. Al-Naimi Petroleum Engineering Research Center, King Abdullah University of Science and Technology (KAUST), Thuwal, Kingdom of Saudi Arabia

\* [natalie.dunn@kaust.edu.sa](mailto:natalie.dunn@kaust.edu.sa)

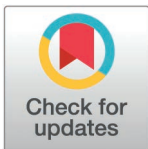

**OPEN ACCESS**

**Citation:** Dunn N, Marchese F, McFadden CS, Macrina L, Watts ME, Nolan MKB, et al. (2025) Unprecedented 2020 coral bleaching reveals unexpected taxa-specific responses in the central Red Sea. *PLoS One* 20(9): e0331235. <https://doi.org/10.1371/journal.pone.0331235>

**Editor:** Parviz Tavakoli-Kolour, University of the Ryukyus, JAPAN

**Received:** May 1, 2025

**Accepted:** August 12, 2025

**Published:** September 9, 2025

**Copyright:** © 2025 Dunn et al. This is an open access article distributed under the terms of the [Creative Commons Attribution License](https://creativecommons.org/licenses/by/4.0/), which permits unrestricted use, distribution, and reproduction in any medium, provided the original author and source are credited.

**Data availability statement:** All relevant data are within the manuscript and its [Supporting Information](#) files.

**Funding:** Funding for this work was provided through KAUST baseline funds to FB. The funders had no role in the study design, data

## Abstract

Sea surface temperature of the Red Sea has increased by up to 0.45 °C per decade over the last 30 years, and coral bleaching events are becoming more frequent. A reef bleaching event was observed in October 2020, whereby some parts of the Red Sea experienced more than 12 °C-weeks. The study sites spanned nearly three degrees of latitude along the central Saudi Arabian Red Sea and were surveyed via structure-from-motion photogrammetry in October 2020 during the bleaching event and again in October 2022 to track the fate of the coral colonies. The *in situ* temperatures in 2020 ranged from 31.9 °C to 32.7 °C, and overall, 65% of the colonies exhibited some bleaching. Nearly half of the colonies exhibited partial or complete mortality in 2022, although 18% exhibited complete mortality. Approximately 27% of the colonies presented no visible change in coloration over the study period, whereas 21% presented recovery over the two years. *Porites*, *Montipora*, *Pocillopora*, and *Stylophora* were classified as winners, whereas *Acropora*, *Goniastrea*, *Xeniidae*, and *Sclerophytum* were classified as losers. At the time of this study, this research was the first to assess the longest-term changes in coral colonies following a major reef bleaching event in the central Saudi Arabian Red Sea. The results suggest that the 2020 bleaching event may be the most severe event on record for the region at the time of the study, and our data underscore the need for enhanced monitoring of corals and environmental data to better understand coral reef ecosystem resilience in a historically data scarce region.

collection and analysis, decision to publish, or preparation of the manuscript.

**Competing interests:** The authors have declared that no competing interests exist.

## Introduction

Shallow-water benthic coral communities are highly dynamic systems and are in a constant cycle of disturbance and recovery [1–4]. Biological and physical processes across multiple spatial and temporal scales, such as predation, storms, disease, and sea level change, shape community dynamics on coral reefs and govern growth and mortality regimes in corals [1,5–8]. Coral mortality dynamics may include both whole-colony (complete) and partial (incomplete) mortality [9–14]. However, investigating these dynamics across large spatial and temporal scales is challenging, and few studies have examined noncatastrophic disturbance regimes to estimate background mortality rates on reefs between 5 m and 10 m deep. For example, mortality rates as part of the dynamic equilibrium in the absence of acute stressors or ephemeral events (background mortality) were estimated to be up to 29% of colonies (at least 80 cm<sup>2</sup> in area) over a 3.4 year period in Heron Island [15], and 26% of colonies greater than 30 cm in diameter suffered some mortality over a span of five years in Curaçao [16]. The prevalence of partial mortality was estimated to be less than 5% for Florida reefs [17] and Australia’s Coral Sea Marine Park [18]. In the Indo-Pacific region, background (whole-colony) mortality was estimated to be less than 8% of colonies per annum [19], and rates of complete mortality of 20% and 30% were classified as moderate and high, respectively [20]. Background mortality in the Red Sea was estimated to be relatively low, whereby dead coral represented an average of 7% of the benthic cover [21,22].

While cycles of disturbances and recovery are ongoing in shallow-water corals, increasing anthropogenic influences can increase the frequency, duration, and intensity of some of these events, reducing the time and opportunity for recovery [23–28]. One such example is coral bleaching. In recent decades, climate change has led to warmer ocean temperatures [14,23,29–33]. This source of potential thermal stress together with elevated solar irradiance can lead to the breakdown of the coral-symbiont association in zooxanthellate organisms [12,34–37] and expulsion of symbiont cells, causing the coral to lose their soft tissue coloration and appear bleached [23,35,38–41]. The thermal threshold for coral bleaching varies with the intensity, duration, and recurrence of thermal stress, as well as the geographic region and taxa involved [23,38,39,42]. Nevertheless, it has been suggested that temperatures only 1–2 °C greater than the summer maxima can lead to coral bleaching [38]. A bleached coral may suffer complete or partial mortality depending on a number of factors, including colony size and species affiliation, environmental conditions, and the intensity of the bleaching event [12,38,42]. Various processes of physical and bioerosion then abrade the dead skeleton, which ultimately results in a loss in structural complexity important for reef biodiversity [43–48]. However, if environmental and biotic conditions allow, the coral may be recolonized by endosymbionts and exhibit recovery, although fitness may be reduced [13,20,42,49,50].

The differential susceptibility of corals to bleaching and bleaching associated mortality has been examined across various temporal and spatial scales. For example, long-term impacts from 2 to 14 years after a thermal stress event have been studied in the Pacific Ocean [51–53], Indian Ocean [13,54], and Arabian Gulf [55]. Within two

years postbleaching, these studies showed that thin-tissued, branching and plating scleractinian colonies with relatively fast growth rates and other weedy traits, such as *Acropora*, *Pocillopora*, and *Stylophora*, declined in relative abundance, whereas thick-tissued, massive and encrusting growth forms, such as *Porites*, did not bleach or recovered from bleaching [13,51,52,55,56,57]. Corals that exhibit higher rates of mortality than background mortality have been termed losers, whereas corals that do not bleach or recover from bleaching have been termed winners [20,51,52,58]. This differential susceptibility to bleaching and mortality across taxa can reduce species richness [59–61], shift community compositions from branching to massive growth forms [51,60,62,63], favor more thermally tolerant taxa, and alter size-frequency distributions toward smaller colony dominance [64]. However, by three years postbleaching, certain branching corals, such as *Acropora* and *Montipora*, became winners as a result of rapid regrowth and/or recruitment [52] or acclimation due to shifts toward more thermally-tolerant Symbiodiniaceae communities [65,66], although species richness may remain low [55]. Alternatively, in some cases, soft corals [67–71] and corallimorpharians [72–74] have been observed to dominate communities following disturbances that specifically impact hard corals whereby their competitive advantages over hard corals, including high fecundity, multiple modes of dispersal, and ability to inhibit larval recruitment of hard corals [75–77], may enable them to establish dominance. *Sclerophyllum* (and *Sinularia*, see [78] for a revision), was the most resistant soft coral to bleaching following long-term surveys in Japan, and while *Lobophyllum* and *Sarcophyton* initially decreased following bleaching, both recovered to prebleaching levels of relative abundance after 12 years [52]. Some species of *Sclerophyllum* have also been shown to monopolize large areas in the Great Barrier Reef, while there have been occasional monospecific stands of *Xenia*, *Lobophyllum* [68], and *Clavularia* [72] and reports of soft-coral dominated communities overall in the Indo-Pacific [79]. However, compared with scleractinians, only a limited number of studies have investigated bleaching in octocorals, and observations have been largely anecdotal [51,80,81].

Previous coral bleaching studies have estimated population-level metrics to investigate the long-term impacts of bleaching on coral communities utilizing various *in situ* survey techniques, including photoquadrats, random quadrats, and line-intercept transects (LIT) [13,51,52,55]. However, fate tracking of individual colonies enables the investigation of patterns of coral bleaching, mortality, and recovery on a relatively fine scale [82–86]. While tagging and tracking individual colonies *in situ* over time can be challenging due to complex colony-scale dynamics, including partial mortality, fission, and fusion [86], structure-from-motion (SfM) photogrammetry has enabled high-resolution, large-scale benthic surveys that facilitate tracking individual colonies over time [87–91]. SfM generates a complete three-dimensional reconstruction of the reef, which is then projected as a two-dimensional orthomosaic [47,48,90]. This method is comparable to traditional *in situ* surveys [90] and holds great potential for monitoring coral colonies and reef structural complexity over time, with the advantage of precise location tracking and ability to cover large areas. However, consistent, standardized protocols in terms of imagery acquisition and reference points are needed to enable accurate reef structural comparisons across years. Nevertheless, the high-resolution orthomosaics provide a permanent photo-record of the benthic community and thus an opportunity for long-term monitoring, with data that can be verified and revisited for future analyses.

Unlike the previously discussed Pacific Ocean, Indian Ocean, and Arabian Gulf [13,51–55], assessing mortality of coral colonies following a bleaching event in the central Saudi Arabian Red Sea has been limited [92,93]. Shallow-water coral communities in the central Red Sea exhibit high levels of biodiversity and endemism and harbor some of the most thermally tolerant corals in the world [41,94–99]. However, as these corals live at their thermal maxima, the region is not immune to bleaching events [41,63,93]. During the 1997–1998 El Niño event [23,100–102], Degree Heating Weeks (DHWs), which is a measure of cumulative heat stress calculated by the number of weeks in which sea surface temperature exceeds 1 °C above the maximum monthly mean over three months [103], reached 9 °C-weeks in the central Saudi Arabian Red Sea, according to the National Oceanic and Atmospheric Administration (NOAA) Coral Reef Watch [104]. Up to 65% of corals on nearshore reefs in the central Red Sea bleached during this time [22], with an estimated 30% mortality by 1999 based on timed swim SCUBA surveys [92]. Another global bleaching event occurred in 2010 [105,106], and DHWs reached 10 °C-weeks in the central Red Sea [107]. Following this event, approximately 74% of

hard corals on inshore reefs and 14% on offshore reefs in the region bleached, and the bleaching prevalence ranged from 13% to 82% across sites, as estimated by the LIT method on SCUBA [93]. After seven months, inshore reefs exhibited reduced species richness and a loss of faster-growing, branching corals, including *Acropora* and *Pocillopora* [93]. The longest global bleaching event on record to date occurred in 2015–2016 in connection with an El Niño thermal anomaly [105,106,108,109], however DHWs only reached a maximum of 1.7 °C-weeks in Thuwal, Saudi Arabia [63,110]. Similar to the 2010 reef bleaching event, shallower inshore reefs exhibited a greater incidence of bleaching than offshore reefs did in 2015, likely due to reduced circulation, a lower heat budget, and proximity to terrestrial stressors [63,93]. The incidence of bleaching ranged from 0.6% to 67% of hard corals across sites, as estimated using the LIT method on SCUBA [63]. Red Sea reefs again exhibited common patterns in 2015, such as high bleaching rates in branching corals, *Acropora* and *Pocillopora*, although postbleaching mortality was not investigated [63]. The prevalence of bleaching for both the 2010 and 2015 events across zooxanthellate reef-building corals *Acropora*, *Montipora*, *Echinopora*, *Goniastrea*, *Pocillopora*, and *Porites* is summarized in Table 1 [63,93], yet postbleaching mortality in the region remains largely understudied.

More recently, many coral reef areas worldwide experienced significant thermal stress in 2020, and the Great Barrier Reef, Indonesia, the Western Pacific, and the Caribbean were identified as bleaching alert areas [111]. In addition, temperatures exceeded 12 °C-weeks in the central Red Sea between Rabigh and Yanbu, Saudi Arabia, in October 2020 [112]. While there is a paucity of data regarding coral bleaching observations in 2020, likely due to the coronavirus pandemic 2019 (COVID-19), unprecedented bleaching prevalence of approximately 45% to 80% of coral cover in the South China Sea were estimated using the LIT method [113]. Similarly, a marine heatwave was reported in the Great Barrier Reef [114], and aerial surveys estimated that between 20% and 60% of reefs [115] and approximately 50% of corals at One Tree Island [116] exhibited severe bleaching, although some areas exhibited bleaching of up to 98% of coral cover [117].

Importantly, a fourth global coral bleaching event was recognized in 2023–2024 [118–120], and as bleaching events are predicted to become both more frequent and more severe [23,28,32,121], it is imperative to better understand long-term, taxon-specific responses to bleaching, and high-resolution SfM orthomosaics can improve our ability to fate track individual colonies over a long period of time. The aims of this study are to (1) describe the thermal anomaly in the central Saudi Arabian Red Sea in October 2020 using remotely sensed sea surface temperature (SST) and DHW data and *in situ* temperature data and (2) fate track scleractinian and octocoral colonies to describe mortality and survival following bleaching across taxa via long-term monitoring using SfM-generated orthomosaics for the first time in the Red Sea.

**Table 1. Coral bleaching susceptibility across taxa during previous bleaching events in the central Saudi Arabian Red Sea. Data from 2015 and 2010 were obtained from Monroe et al. 2018 and Furby et al. 2013, respectively.**

| Taxon                                 | % cover bleached |      |
|---------------------------------------|------------------|------|
|                                       | 2015             | 2010 |
| Acroporidae                           |                  | 35   |
| <i>Acropora</i>                       | 38               |      |
| <i>Montipora</i>                      | 35               |      |
| Merulinidae                           |                  | 38   |
| <i>Echinopora</i>                     | 20               |      |
| <i>Goniastrea</i>                     | 35               |      |
| Pocilloporidae ( <i>Pocillopora</i> ) | 18               | 18   |
| Poritidae ( <i>Porites</i> )          | 35               | 35   |

<https://doi.org/10.1371/journal.pone.0331235.t001>

## Methodology

### Study sites

In October 2020, during the bleaching event, seven offshore reefs spanning more than 165 km of coastline between Rabigh and Yanbu, Saudi Arabia, were opportunistically selected and surveyed during the KAUST-Yanbu 2020 Expedition onboard M/Y Dream Island (Fig 1). Sites were resurveyed two years later, in October 2022, during the KAUST-Yanbu 2022 Expedition onboard the M/Y Dream Master. One transect per site was installed on the exposed side of each reef along the depth contour, between 5 and 10 m deep, where bleaching was previously most evident in the region [63,93]. The target dimensions of each transect in the field were 30 m long by 5 m wide, following the protocol developed by Fukunaga et al. [122,123] in Hawaii. The transects were intentionally longer than those used in previous bleaching (10 m) [63,93] and benthic surveys (20 m) [124] in the central Red Sea to (1) capture the patchy nature of Red Sea coral communities [125] and (2) anticipate that the reconstructed digital area would be smaller due to high reef sinuosity and uncertainty of overlap between years.

### Image acquisition and model generation

A SCUBA diver collected a series of overlapping images for each transect by swimming slowly in a lawnmower pattern 1 m above the substrate, following survey methods developed by Burns et al. [47] for underwater three-dimensional SfM reconstruction surveys [48,53,54,90,122,123]. A Sony  $\alpha$ 7r IV with a 12–24 mm f/2.8 lens set at 24 mm with Easydive Leo3

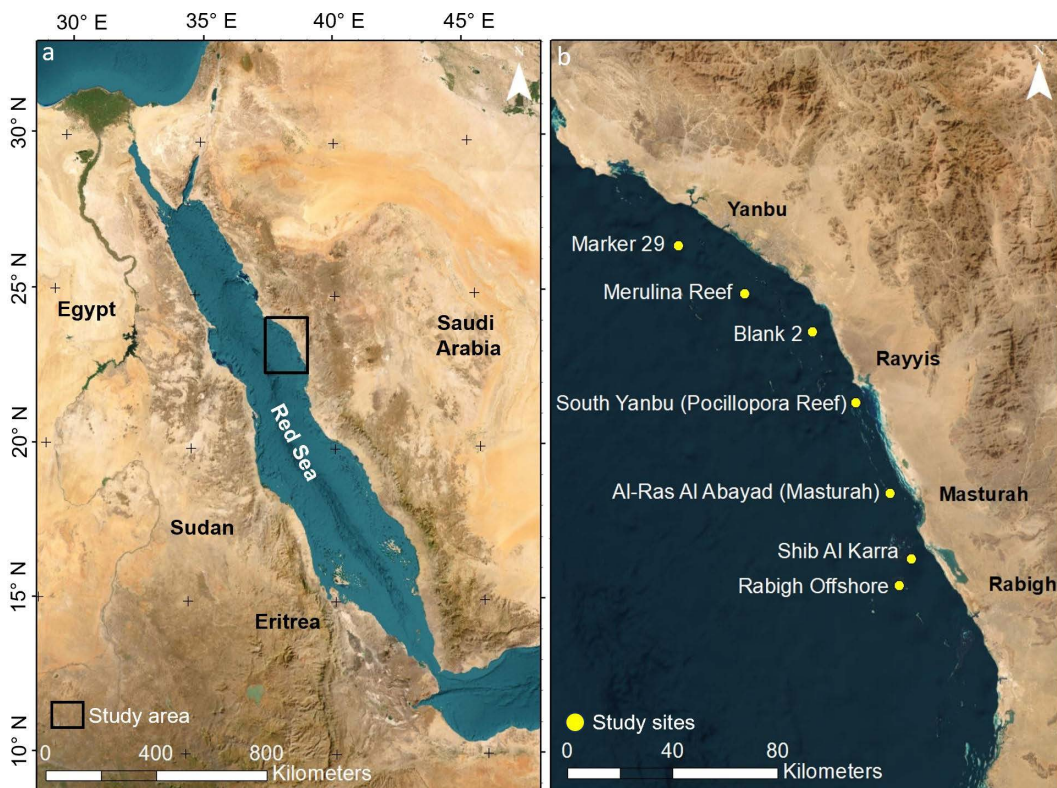

**Fig 1. Study sites in the central Saudi Arabian Red Sea.** (a) Map of the Red Sea showing the location of the study region (black polygon). (b) Study sites between Rabigh and Yanbu surveyed in 2020 and 2022. Basemap satellite images accessed from World Imagery ESRI Tile Layer. Credits: Esri, Maxar, GeoEye, Earthstar Geographics, CNES/Airbus DS, USDA, USGS, AeroGRID, IGN, and the GIS User Community.

<https://doi.org/10.1371/journal.pone.0331235.g001>

Wi underwater housing was used for image acquisition. Owing to logistical constraints, an average of 2,500 images per transect were collected in 2022 while an average of approximately 1,200 images per transect were collected in 2020. Images were processed in Agisoft Metashape v2.0 [126] to generate three-dimensional models and orthomosaics of each transect using the processing parameters indicated in Table A in [S1 Text](#), and further details are described in the supplemental methodology. SfM processing with Agisoft Metashape was performed through Ibex, the HPC (High-Performance Computer) cluster at King Abdullah University of Science and Technology (KAUST, Saudi Arabia). All benthic analyses were conducted using the orthomosaics.

### Sea surface temperature data

Two satellite datasets for heat stress were obtained from the National Oceanic and Atmospheric Administration (NOAA) Coral Reef Watch (CRW) and National Aeronautics and Space Administration (NASA). First, monthly SST averages for October 2020 and 2022 were obtained using the NASA MODIS Giovanni Tool at a resolution of 4 km [127], and the 4 km × 4 km pixel value was extracted for each site each year using the multi-values to points tool in ArcMap v10.8.2. While this is the highest-resolution dataset available for the region to date, all the sites were at least 11 km apart; therefore, a site-specific SST for each transect could be estimated. Second, DHWs were obtained from NOAA Coral Reef Watch [112] to visualize and compare the duration and intensity of heat stress for the two years. To corroborate the satellite data, in October 2020, a WTW Profiline 2EA312 pH/Cond 3320 portable meter was used to obtain the SST at each site. In October 2022, an Ocean Seven 310 multiparameter CTD was deployed at each site, and the single surface value was extracted for consistency with the WTW meter measurements. SST data were averaged across all sites and compared between years using Wilcoxon signed-rank tests for both satellite and *in situ* data [128].

### Coral colony fate tracking

Similar to other SfM studies that select a subset of coral colonies per transect [87–91], *in situ* benthic survey methodology currently used in the Red Sea by Red Sea Global [129] was adapted to randomly tag and fate track a subset of coral colonies per transect within the orthomosaics using ArcGIS Desktop v10.8.2 [130]. For each transect, 100 colonies that appeared in both years were digitally tagged and identified to the lowest possible taxonomic level (typically genus) in collaboration with taxonomic experts for reef-building corals and soft corals, and the growth form and condition at  $T_0$  (October 2020) were recorded (Table 2). For the most abundant taxa (*Pocillopora*, *Acropora*, *Goniastrea*, and *Porites*), 15 colonies per genus for each transect were targeted. In cases where model distortion impaired identification, raw images were consulted. Tagged colonies were then located in the  $T_1$  (October 2022) orthomosaic, and their condition was again annotated (see ESM\_1).

The condition (state of the colony at a given time point) for 2020 and 2022 was coded by the scenarios described in Table 2. To streamline the analyses, paling and fluorescing colonies were classified as partial bleaching. Partial mortality in 2022 was defined as a qualitative negative change in live coral tissue. The remaining living tissue of the colony otherwise had normal coloration. The scenario refers to the condition of the colony across both years. Scenarios were then grouped according to the changes exhibited over the study period via the adapted categories discussed in Baird and Marshall [11]. The category refers to the change exhibited between the two years and includes (1) no visible change in coloration during the study period, (2) recovery (bleaching in 2020 and normal coloration in 2022), (3) bleaching in 2022, (4) partial mortality of the colony in 2022, (5) complete mortality (with the skeleton present), and (6) complete mortality (colony is absent from the transect).

To understand community composition across transects, the point-intercept methodology was applied to the 2020 orthomosaics. Overall benthic categories were identified every 0.5 m along three replicate 20 m long transects per orthomosaic.

**Table 2. Possible colony bleaching scenario codes with conditions for 2020 and 2022. The scenarios observed in our study in the central Red Sea are in bold. The first letter of the pair in each code describes the condition of the colony in 2020, and the second letter describes the colony in 2022. For example, a colony with the code 'BA' refers to a colony that exhibited partial bleaching in 2020 and normal coloration in 2022. The colors indicate simplified categories that were used in binomial logistic regression analyses and correspond to the colors in Fig 5.**

|      |                                        | 2020      |                   |                    |                   |                                       |                                        |
|------|----------------------------------------|-----------|-------------------|--------------------|-------------------|---------------------------------------|----------------------------------------|
|      |                                        | Normal    | Partial bleaching | Complete bleaching | Partial mortality | Partial bleaching & partial mortality | Complete bleaching & partial mortality |
| 2022 | Normal                                 | AA        | <b>BA</b>         | <b>CA</b>          | DA                | EA                                    | FA                                     |
|      | Partial bleaching                      | AB        | <b>BB</b>         | <b>CB</b>          | DB                | EB                                    | FB                                     |
|      | Complete bleaching                     | AC        | BC                | <b>CC</b>          | DC                | EC                                    | FC                                     |
|      | Partial mortality                      | <b>AD</b> | <b>BD</b>         | <b>CD</b>          | <b>DD</b>         | <b>ED</b>                             | <b>FD</b>                              |
|      | Partial bleaching & partial mortality  | <b>AE</b> | <b>BE</b>         | CE                 | DE                | <b>EE</b>                             | FE                                     |
|      | Complete bleaching & partial mortality | AF        | <b>BF</b>         | <b>CF</b>          | DF                | EF                                    | FF                                     |
|      | Complete mortality (present)           | <b>AG</b> | <b>BG</b>         | <b>CG</b>          | <b>DG</b>         | <b>EG</b>                             | <b>FG</b>                              |
|      | Complete mortality (absent)            | <b>AH</b> | <b>BH</b>         | <b>CH</b>          | DH                | <b>EH</b>                             | <b>FH</b>                              |

<https://doi.org/10.1371/journal.pone.0331235.t002>

Statistical analyses were run in R v4.3.1 [132] to determine the prevalence of bleaching in 2020 and the fates of colonies in 2022. First, all colonies were pooled across sites, and all scenarios were summarized in a Sankey plot to understand the overall severity of bleaching and mortality of the 2020 bleaching event. To describe overall bleaching and mortality patterns for taxa represented by at least ten [133] colonies across all the sites in total, the scenarios were first simplified to two categories each for 2020 (not bleached and bleached) and 2022 (survival and mortality) to maximize the sample sizes per category and enable binomial logistic regression analyses. The color coding in Table 2 shows how the scenarios were simplified. A binomial logistic regression was conducted via the R package stats v4.3.1 [132] to determine whether bleaching patterns differed across sites and taxa. A second binomial logistic regression was conducted to determine if mortality differed across sites and taxa. For both models, a family quasibinomial was used to account for overdispersion, and residual plots were examined. Tukey's post hoc test for pairwise comparisons was conducted via the R package multcomp v1.4-25 [134] to determine which sites and taxa were significantly different. Finally, a subset of taxa that met at least one of the following criteria was selected to be categorized into winners and losers (*sensu* [51]): (1) the taxon was represented by more than 40 colonies and was significant in the binomial logistic regression analyses, or (2) the taxon has previously been reported as a winner or loser in the Red Sea and other geographic regions [13,51,52,55,63,93]; these taxa were *Porites*, *Montipora*, *Pocillopora*, *Goniastrea*, *Acropora*, *Stylophora*, *Sclerophyllum*, and *Xeniidae*. Those colonies were pooled across sites, and scenarios were summarized in Sankey plots for each taxon. Losers were defined as those taxa that (1) exhibited moderate to high complete mortality rates ( $\geq 20\%$ ) [20] and/or (2) exhibited little recovery ( $< 20\%$ ), with recovery defined as colonies that exhibited partial or complete bleaching in 2020 and normal coloration in 2022. All Sankey diagrams were generated using the online tool <https://sankeymatic.com/build/>. Finally, nonmetric multidimensional scaling (NMDS) analysis was performed via the R package vegan v2.6-4 [135] to ordinate hard coral taxa according to their proportions of different bleaching scenarios outlined in each Sankey plot.

To address the aims of this study, we used a consistent conceptual framework in which we defined four key bleaching terms: resistance, tolerance, susceptibility, and resilience. Resistance refers to colonies that exhibit lower bleaching than adjacent colonies exposed to the same thermal stress [20,93,136] and can be described by the prevalence of bleaching. Tolerance is when bleached colonies recover, and mortality is lower while survival is higher than adjacent colonies exposed to the same degree of thermal stress [20,136]. The susceptibility of coral colonies to bleaching then encompasses both resistance and tolerance collectively or whether the coral bleaches and suffers mortality after being exposed

to thermal stress [20,136]. Resilience is at the larger, ecosystem scale and refers to the ecological capacity of a reef ecosystem to recover following a large-scale bleaching event and persist at a steady state in terms of species diversity and relative abundance [20,136,137].

## Results

### Sea surface temperature

SST across sites was significantly greater in 2020 than in 2022, according to both *in situ* measurements and satellite data ( $p$  value=0.007 each; Fig 2). On average, *in situ* values were approximately 1 °C higher in 2020, and satellite SSTs were about 0.8 °C higher in 2020. For reference, a historical annual baseline for the region is provided in Fig A in S1 Text. In 2020, during the bleaching event, *in situ* temperatures ranged from 31.9 °C to 32.7 °C, whereas satellite temperatures ranged from 31.66 °C to 31.79 °C (Table B in S1 Text). Furthermore, DHWs were anomalously high in October 2020, reaching at least 12 °C-weeks in some areas [112], which is 5 °C-weeks higher than the maximum reported in the region in 2010 [107] (Fig 3). Additional maps of the study area showing the DHW for each year are presented in Fig B in S1 Text.

### Orthomosaic properties

A total of 25,865 digital images yielded 14 SfM orthomosaics for the seven transects surveyed in 2020 and 2022. Since transects were established along a depth contour, most orthomosaics exhibited a curved shape, following the shape of the reef. The models were not aligned due to differences in image acquisition between years, which resulted in slightly different angles and greater errors in the 2020 models. Nevertheless, a qualitative visual assessment indicated that at least 70% of each of the seven transect areas sufficiently overlapped between years, allowing for identification and matching of 100 colonies per transect for each time point. The final area of overlap between years was, on average, 64.2 m<sup>2</sup> across transects. The average root mean square error (RMSE), a measure of reprojection error [138] for the 2020 orthomosaics was 0.032 m ± 0.031 m, whereas the average RMSE for the 2022 orthomosaics was 0.012 m ± 0.013 m. The average resolution for the 2020 orthomosaics was 0.52 mm ± 0.25 mm, and that for the 2022 orthomosaics was 0.61 mm ± 0.09 mm.

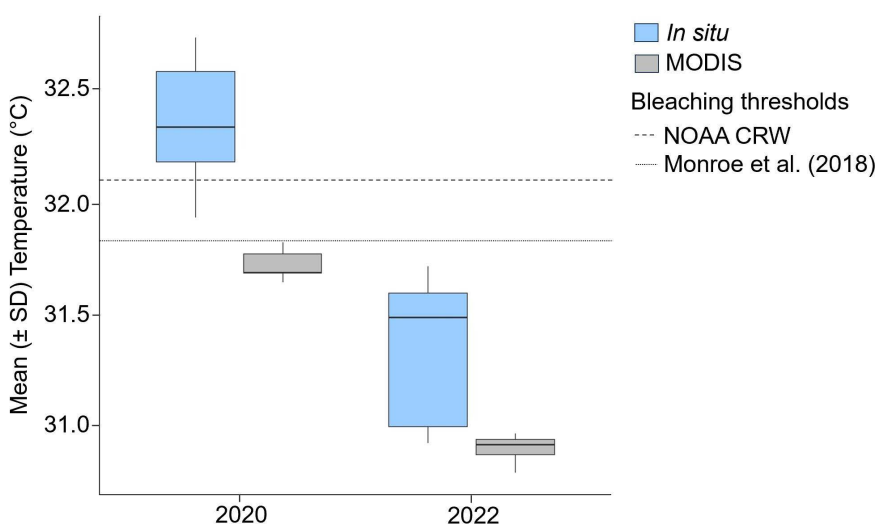

**Fig 2. Average (± standard deviation) sea surface temperature (°C) across the seven study sites in the central Saudi Arabian Red Sea for *in situ* measurements (light blue) and MODIS data (gray) [127].** *In situ* data were collected with a WTW meter in 2020 and with CTD OceanSeven in 2022. Bleaching thresholds described for the region by NOAA Coral Reef Watch and Monroe et al. [63] are indicated by dotted lines.

<https://doi.org/10.1371/journal.pone.0331235.g002>

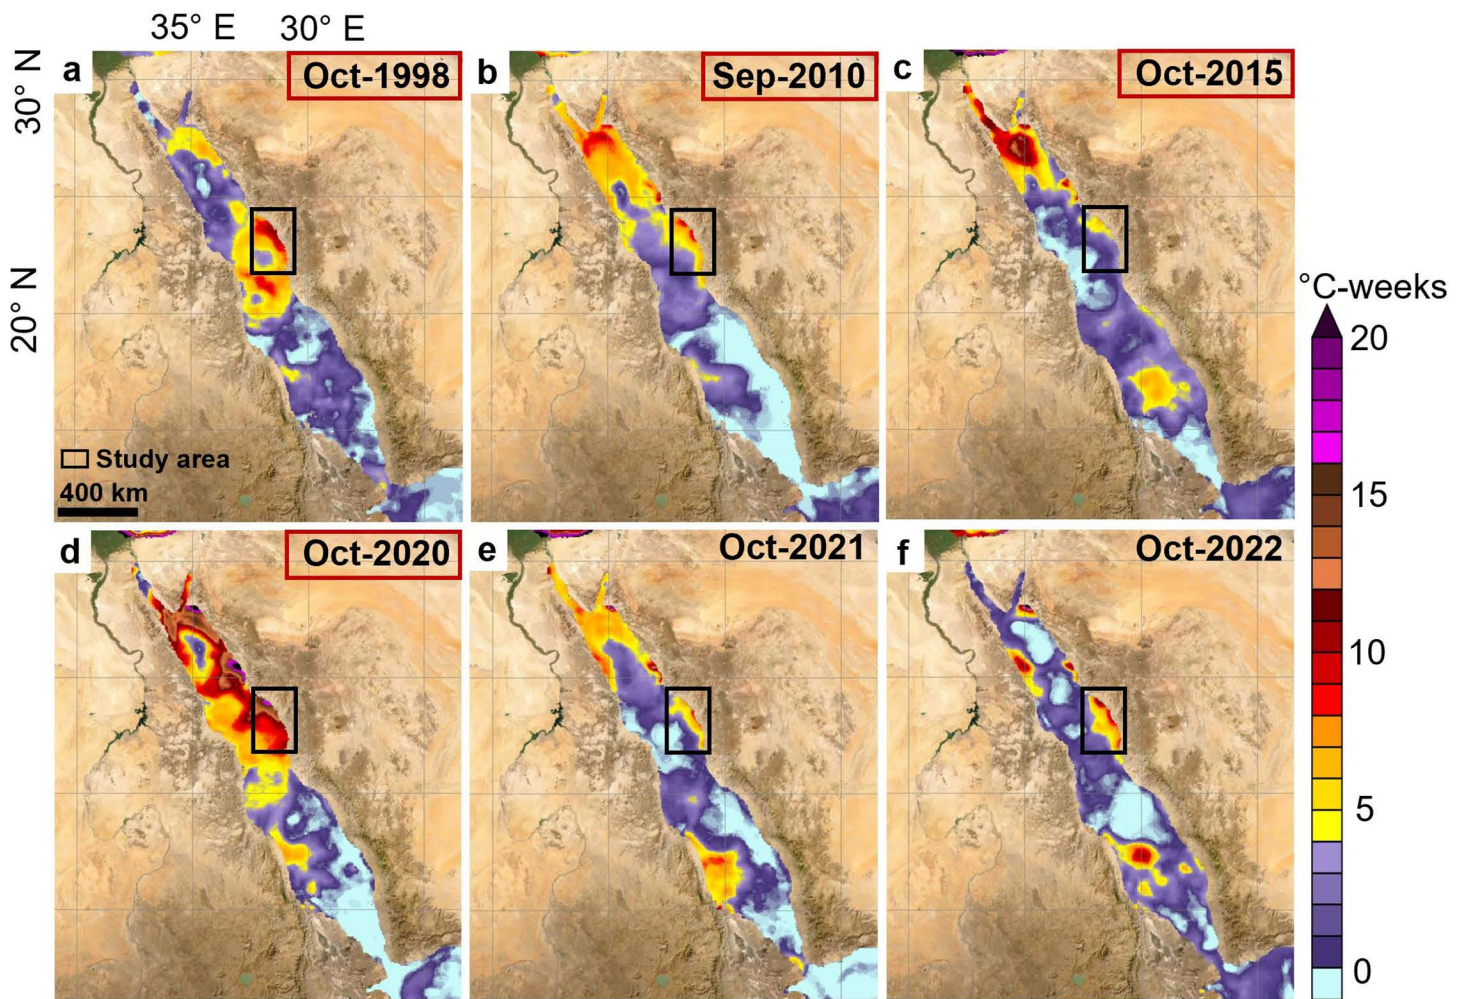

**Fig 3. Degree Heating Weeks (DHW) for the Red Sea from October 1998 to October 2022 (a-f).** The black polygon includes the study region in the central Red Sea between Rabigh and Yanbu. Red polygons highlight bleaching events in (a) October 1998, (b) September 2010, (c) October 2015, and (d) October 2020 [131]. Basemap satellite images accessed from World Imagery ESRI Tile Layer. Credits: Esri, Maxar, GeoEye, Earthstar Geographics, CNES/Airbus DS, USDA, USGS, AeroGRID, IGN, and the GIS User Community.

<https://doi.org/10.1371/journal.pone.0331235.g003>

### Coral colony fate tracking

Across the seven transects, a total of 700 coral colonies representing 35 taxa were digitally tagged, identified, and annotated for 2020 and 2022 (Fig 4a–c). In total, 65% of the colonies exhibited partial or complete bleaching in 2020, and nearly half of the colonies exhibited partial or complete mortality in 2022, although 18% exhibited complete mortality (Fig 4d). Approximately 6% of the colonies were bleached again in 2022. Finally, about 27% of the total colonies showed no visible change in coloration over the study period, while 21% showed recovery over the two years. Bleaching prevalence across sites ranged from approximately 50% of colonies to nearly 80%; however, there was no clear spatial pattern, and there were no significant differences in bleaching patterns among sites (Fig C in S1 Text;  $p$  value = 0.0695). The overall mortality rates ranged from 36% of colonies on Merulina Reef to 61% on Blank 2, and only these two sites were significantly different ( $p$  value = 0.0059). Overall benthic community composition varied across sites, and Merulina Reef had the most unique coral community (Fig F in S1 Text).

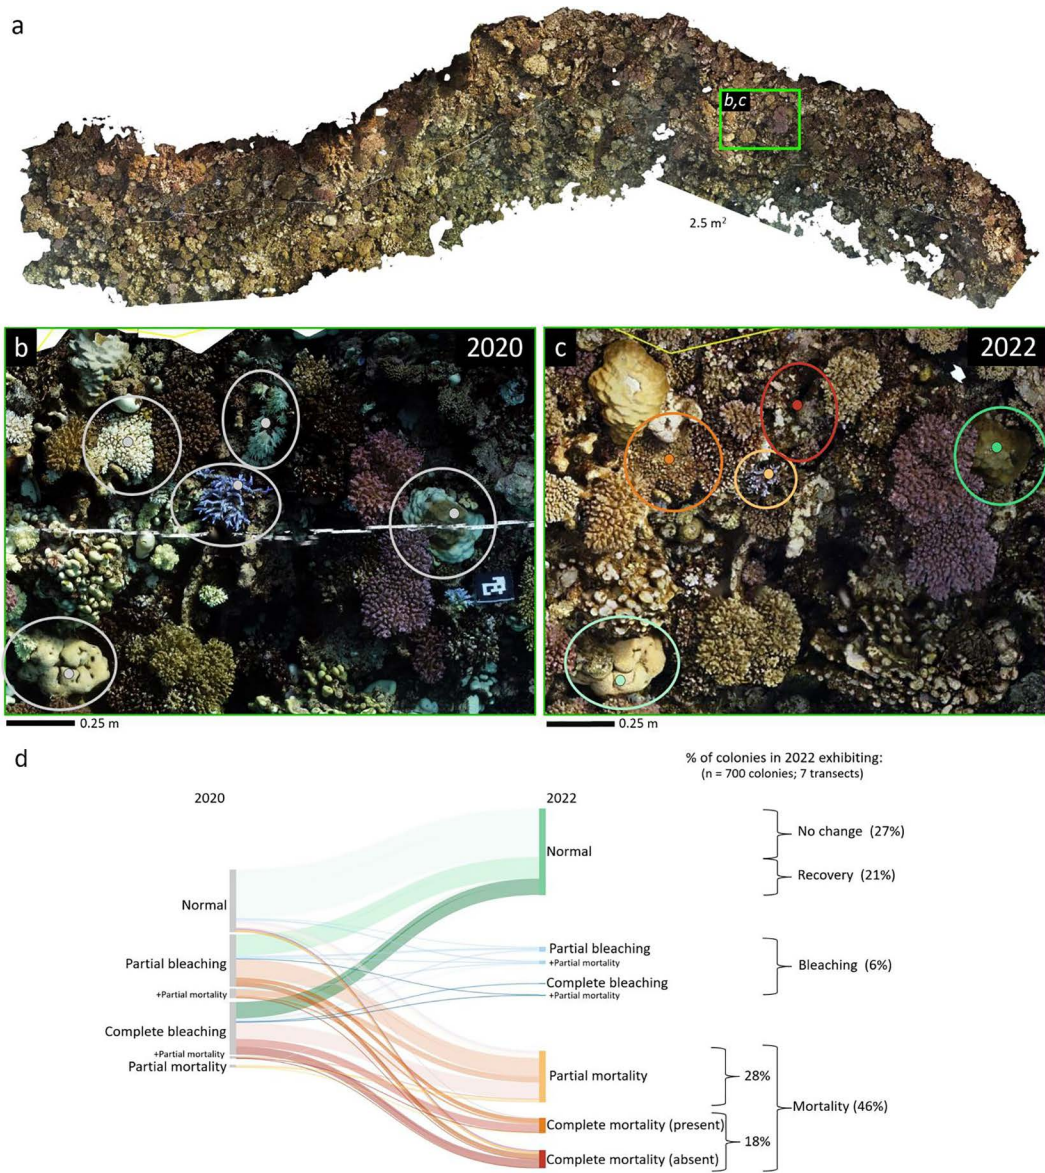

**Fig 4. Observed coral bleaching scenarios in the central Saudi Arabian Red Sea from October 2020 to October 2022.** (a) Example orthomosaic of site Blank 2 in 2022. The green polygon indicates a 2.5 m<sup>2</sup> area along the transect, where five colonies illustrate example scenarios in (b) 2020 and (c) 2022. The colors of the circles correspond to different fates in 2022: no change (light green), recovery (dark green), partial mortality (yellow), complete mortality with the skeleton present (orange), and complete mortality with the colony absent (red). (d) Sankey diagram summarizing all the observed coral bleaching scenarios in 2020 (left-hand side) and 2022 (right-hand side) for the 700 hard and soft coral colonies surveyed across the seven sites. Line thickness is proportional to the number of colonies that exhibited a particular scenario.

<https://doi.org/10.1371/journal.pone.0331235.g004>

In total, 13 coral taxa were represented by at least ten colonies. Of these, *Galaxea*, *Goniastrea*, *Acropora*, *Porites*, *Lobophyllia*, *Sclerophyllum*, *Echinopora*, and Fungiidae had the highest prevalence of bleaching, whereby more than 50% of colonies across sites were bleached in 2020 (Fig 5a). *Montipora* and *Stylophora* presented a bleaching rate of approximately 50%. Relatively low incidences of bleaching occurred in *Pocillopora* (26%) and *Xeniidae* (23%). However, all pairwise comparisons of bleaching across taxa revealed that groups that were significantly different were *Acropora*,

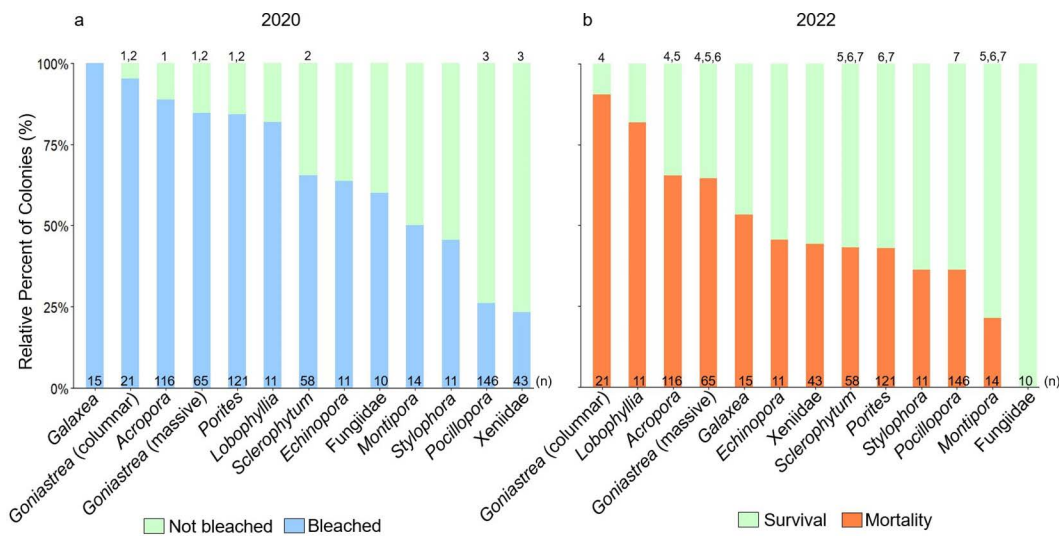

**Fig 5. Percent of coral colonies in the central Saudi Arabian Red Sea that were (a) bleached (blue) and not bleached (green) in 2020 and (b) exhibiting survival (green) and mortality (orange) in 2022.** Numbers above bars indicate significantly different groups based on binomial logistic regression analyses, and taxa without numbers above were statistically similar to the rest. Groups 1 and 2 had significantly different bleaching rates, and Groups 3, 4, 5, and 6 had significantly different mortality rates.

<https://doi.org/10.1371/journal.pone.0331235.g005>

*Goniastrea* (massive and columnar), and *Porites* (Group 1); *Goniastrea* (massive and columnar), *Porites*, and *Sclerophyllum* (Group 2); and *Pocillopora* and *Xeniidae* (Group 3) (Table C in [S1 Text](#); p values < 0.05). By 2022, approximately 25% or more of the colonies per taxon exhibited partial or complete mortality, with *Goniastrea* (columnar and massive), *Lobophyllia*, *Acropora*, and *Galaxea* exhibiting more than 50% mortality ([Fig 5b](#)). *Echinopora*, *Xeniidae*, *Sclerophyllum*, *Porites*, *Stylophora*, and *Pocillopora* exhibited between 25% and 50% mortality, whereas *Montipora* presented less than 25% mortality, and *Fungiidae* showed 0% mortality. The groups that were significantly different were *Goniastrea* (columnar and massive) and *Acropora* (Group 4); *Acropora*, *Goniastrea* (massive), *Sclerophyllum*, and *Montipora* (Group 5); *Goniastrea* (massive); *Sclerophyllum*, *Porites*, and *Montipora* (Group 6); and *Sclerophyllum*, *Porites*, *Pocillopora*, and *Montipora* (Group 7) ([Fig 5b](#); Table C in [S1 Text](#)). Detailed scenarios of all the taxa observed are provided in Fig D and E in [S1 Text](#).

Pooled across the seven transects, 56–72% of the *Porites* (n = 121), *Montipora* (n = 14), *Pocillopora* (n = 146), and *Stylophora* (n = 11) colonies exhibited no visible change in coloration over the study period or recovered over the two years, and less than 20% complete mortality ([Fig 6a–d](#)). Each genus also presented unique nuances. For example, *Porites* had a high prevalence of bleaching but also presented a high recovery rate, suggesting high tolerance to bleaching. However, it is also important to note the high level (38%) of partial mortality in *Porites*. Although the sample size was small, the majority of *Montipora* colonies exhibited no visible change in coloration over the study period (43%), and those that did bleach presented a high level of recovery (29%). Furthermore, only 14% of *Montipora* colonies exhibited partial or complete mortality. More than half of the *Pocillopora* colonies exhibited no visible change in coloration over the study period or recovered (58%), and while 24% of the *Pocillopora* colonies exhibited partial mortality, only 8% exhibited complete mortality. Similarly, 63% of *Stylophora* (n = 11) colonies exhibited no visible change in coloration over the study period or recovered, whereas 27% exhibited partial or complete mortality and 18% exhibited complete mortality, although the sample size was relatively small. In contrast, while 34% of *Acropora* colonies presented no visible change in coloration over the study period or recovered, most colonies presented partial or complete mortality (64%), with 40% exhibiting complete mortality ([Fig 6e–g](#)). Approximately 90% of columnar *Goniastrea* colonies exhibited partial or complete mortality, with approximately 24% showing complete mortality. Compared

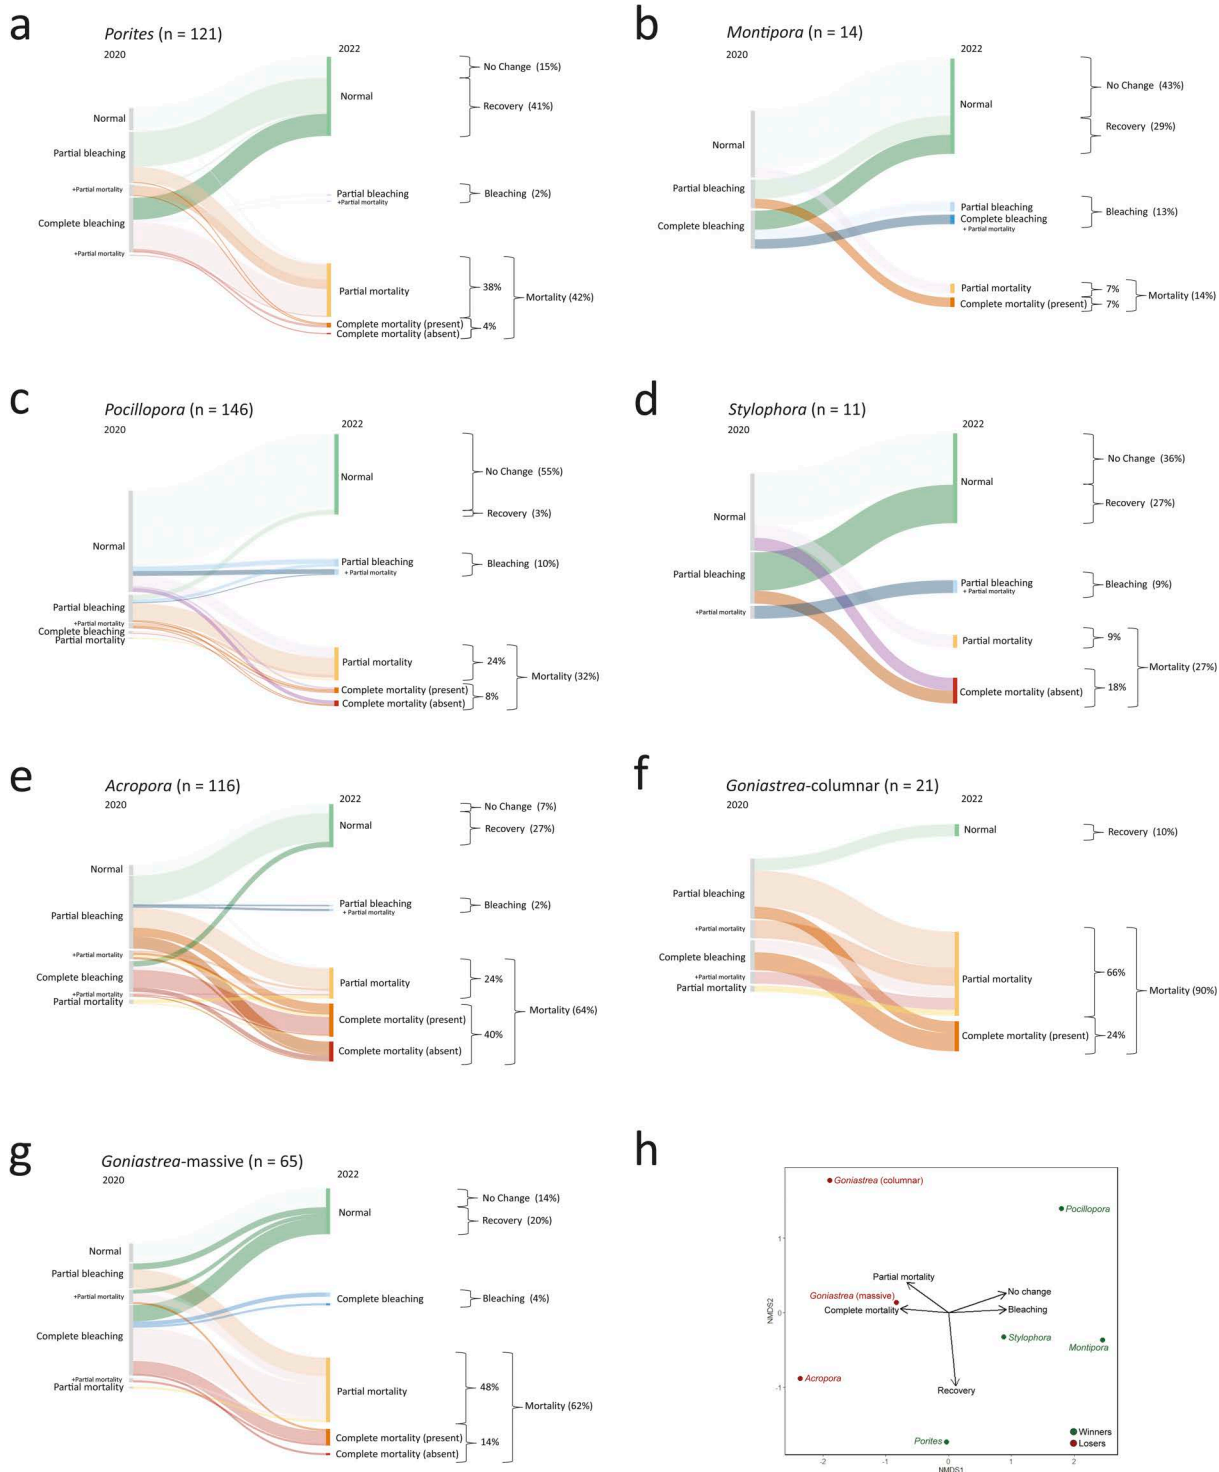

**Fig 6. Sankey diagrams summarizing all observed coral bleaching scenarios in the central Saudi Arabian Red Sea in 2020 (left-hand sides) and 2022 (right-hand sides) for (a–d) winner and (e–g) loser hard corals pooled across the seven study sites. Line thickness is proportional to the number of colonies that exhibited a particular scenario. (h) NMDS plot ordinating coral taxa based on their proportion of bleaching scenarios exhibited.**

<https://doi.org/10.1371/journal.pone.0331235.g006>

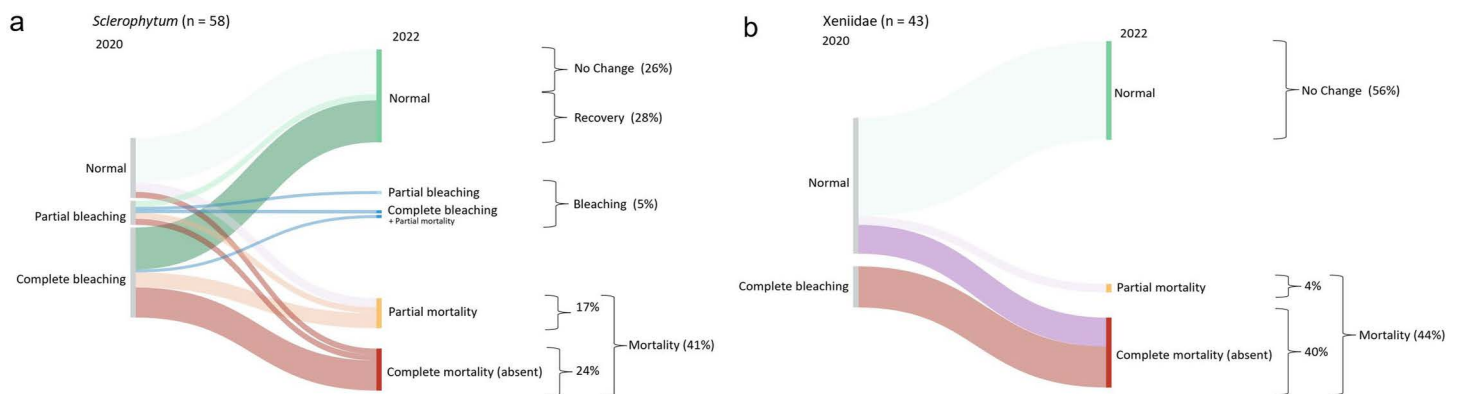

**Fig 7. Sankey diagrams summarizing all observed coral bleaching scenarios in the central Saudi Arabian Red Sea in 2020 (left-hand sides) and 2022 (right-hand sides) for lesser soft corals (a) *Sclerophyllum* and (b) *Xenidiidae* pooled across the seven study sites. Line thickness is proportional to the number of colonies that exhibited a particular scenario.**

<https://doi.org/10.1371/journal.pone.0331235.g007>

with columnar colonies, massive *Goniastrea* colonies had a lower mortality rate (14% complete and 48% partial), but only 20% of the colonies exhibited recovery, while the remaining 18% exhibited no visible change in coloration over the study period or showed bleaching in 2022. The NMDS analysis yielded a stress value of 0.0533 and revealed a separation between winners and losers, as described above (Fig 6h).

For soft corals, while 54% of *Sclerophyllum* colonies exhibited no visible change in coloration over the study period or recovered, 41% exhibited partial or complete mortality, with 24% exhibiting complete mortality (Fig 7). Similarly, over half (56%) of the *Xenidiidae* colonies exhibited no visible change in coloration over the study period, while the remaining 44% of *Xenidiidae* colonies exhibited partial or complete mortality, with 40% showing complete mortality. Overall, *Xenidiidae* and *Pocillopora* presented the highest rates of resistance (>50%), and *Goniastrea* (columnar) and *Acropora* presented the lowest rates (<10%). *Porites* and *Montipora* presented the highest rates of tolerance (41% and 29%, respectively), whereas *Xenidiidae* and *Pocillopora* presented the lowest rates (<5%). Furthermore, *Xenidiidae* and *Acropora* had the highest rates of complete mortality (40% each).

## Discussion

In this study, the thermal anomaly in the central Saudi Arabian Red Sea during the bleaching event in 2020 was described, and coral colonies were fate tracked to evaluate mortality and survival two years following the bleaching event. This research represents the first record of SfM in the Red Sea and the longest-term change following a bleaching event in some of the most thermally tolerant corals in the world [41,99].

### Sea surface temperature

The concept of thermal thresholds in corals is still a subject of debate, and while intensity, duration, and recurrence of high temperature events are known to influence thermal stress, their respective roles together with irradiance in bleaching are still poorly understood [23,38,39,42]. In this study, although only a 1 °C temperature difference was observed between years, corals presented high mortality rates. This may be in part due to corals living at their thermal maxima in the region [41] but is also likely a function of considerably prolonged thermal stress. Indeed, the estimated 12 °C-weeks reported in the central Red Sea in 2020 was the highest on record in the region at the time of this study to our knowledge. The *in situ* temperature range in 2020 in this study was similar to the temperature range described during the bleaching event in 2015 [63], providing further support for this threshold in the region. However, there is a sparsity of historical *in situ* data,

and satellite data are relatively coarse in the central Red Sea; therefore, future studies should deploy a network of data loggers together with monitoring protocols.

### Orthomosaic performance and the relevance of permanent SfM transects for monitoring

SfM methodology enabled a high-resolution, verifiable record of benthic communities, which allowed for the tracking of individual coral colonies across a relatively large spatial scale over two time points. SfM processing using Agisoft Metashape via Ibx resulted in a reconstruction time of 12–16 hours per transect, which was relatively quick compared to an average desktop computer, making this methodological workflow more efficient and scalable. Owing to differences in image acquisition methodology across the two years, our analyses were limited to point-based annotations using orthomosaics and precluded two- and three-dimensional spatial analyses in several ways. First, bleaching and mortality observations were qualitative because changes in surface area could not be accurately quantified at the colony scale. Similarly, structural complexity of each transect could not be accurately quantified and compared across years. Nevertheless, the use of SfM in this study was fundamental to support the first assessment of long-term changes in scleractinian and octocoral colonies following a major reef bleaching event in the central Saudi Arabian Red Sea. Permanent SfM plots surveyed again over time can provide valuable baseline information in the context of increasing bleaching events and other disturbances and enable the ability to investigate additional, unforeseen questions in the future. In fact, two more bleaching events have already occurred in the central Red Sea since 2020 [131,139,140], and a subset of the transects presented in this study has been resurveyed. Furthermore, the methodology outlined here can serve as a reference for further studies. We suggest the implementation of standardized monitoring protocols and prioritizing the establishment of a network of permanent monitoring sites to facilitate the collection of robust, time series data that can enhance our understanding of coral recovery and ecosystem resilience over time.

### Coral bleaching prevalence across sites

The similarity of bleaching patterns across sites could be a result of a number of factors. Although the sites surveyed in this study spanned 165 km of coastline, they were all located within the central Red Sea, which is a region spanning approximately six degrees of latitude [141,142] that is distinct in terms of temperature and other water properties [143], habitat types [94], fish and benthic communities [125,144], and genetic connectivity [145]. In fact, *in situ* measurements and satellite data revealed that temperature anomalies were relatively similar across sites. Furthermore, all the sites were located on offshore reefs, which could have minimized the potential for terrestrial and inshore stressors to influence and compound thermal stress [53,146].

While overall mortality rates were not significantly different across most sites, it is important to note that sites where the *in situ* temperature was more than 1 °C greater in 2020 than in 2022 generally presented higher mortality rates than sites where the temperature anomalies were less than 1 °C. These findings support those of Jokiel and Coles [38], who reported that even 1 °C greater than the summer maxima can lead to mass bleaching events. Interestingly, the only mortality rates that were significantly different were those of Merulina Reef and Blank 2, even though they are adjacent sites (Fig 1). This could have been in part due to differences in benthic community composition (Fig F in S1 Text). The coral community of Merulina Reef was the most distinct across the seven sites and was dominated by *Acropora* thickets. Although *Acropora* is typically classified as a loser, as in this study, the formation of dense thickets may facilitate survivorship through self-shading [147], increased asexual propagation, or minimizing additional pressures, such as predation [148]. Indeed, while the proportion of partial mortality of *Acropora* colonies on Merulina Reef was relatively high, the complete mortality rate was lower than that for *Acropora* colonies at some of the other sites (Fig G in S1 Text).

Although different methodologies were utilized, the range of bleaching prevalence across sites in this study (50–80% of corals) was at the higher end of the range reported during the 1998 (65%) [22], 2010 (13–82%) [93], and 2015 (0.6–67%)

[63] bleaching events in the central Red Sea. However, previous studies included more susceptible inshore reefs [63,93], whereas in this study, only offshore reefs were surveyed. Considering the bleaching prevalence for only offshore reefs, bleaching was substantially greater in 2020 (50–80% of corals) than in 2010 (19.6% ± 4.6% of hard corals) [93] and 2015 (2.2% ± 2.7% of hard corals) [63]. Furthermore, the 2015 bleaching event was globally considered to be the longest bleaching event on record [105,106]; however, the incidence of bleaching was actually lower in the Red Sea during this event than in 2020. In addition, the bleaching incidence observed in this study was at the higher end of the range reported from the Great Barrier Reef (20–60% of reef flats exhibited severe bleaching) during the same year [115,116]. The bleaching incidence reported in shallow coastal areas in the South China Sea in 2020 (45–80% of corals) [113] was similar to the incidence reported here; however, local eutrophication in the South China Sea may have contributed to greater thermal sensitivity. However, incidence of bleaching was higher in the South China Sea during the most recent event in 2024 [120]. Together with the DHW analysis previously discussed, these findings suggest that the 2020 bleaching event may be the most severe bleaching event on record in the central Saudi Arabian Red Sea at the time of this study, however additional bleaching in the region has been recorded since 2020 [118,119,140]. Importantly, since this event overlapped with the COVID-19 pandemic, few studies have investigated bleaching incidence, and it is possible that impacts in other geographic regions may not have been recorded.

### Bleaching susceptibility across taxa

A total of 700 coral colonies encompassing 35 taxa (32 genera plus two families) were fate tracked, and at least ten colonies per taxon were included in the descriptive logistic regression analyses, whereas at least 40 colonies per taxon with the exception of *Montipora* (n = 14) and *Stylophora* (n = 11) were investigated in the more detailed Sankey plots. With the exception of *Montipora*, *Porites*, *Lobophyllia*, and Fungiidae, all the taxa represented by at least ten colonies presented complete mortality rates higher than the expected background mortality for the region (7%; Fig 5) [92], suggesting the occurrence of a disturbance beyond inherent dynamics from October 2020 to October 2022. However, it is important to note that this reference background mortality rate was estimated by the percentage of benthic cover represented by dead coral [92], whereas the mortality rate in this study was estimated by the percentage of colonies that exhibited complete mortality over the two years. In this way, mortality estimates in this study are cumulative, including both bleaching-related and background mortality, and mortality rates may have been influenced by additional factors that were not observed, such as disease or crown-of-thorns. Similarly, as an opportunistic snapshot in time, a colony that was observed to exhibit no visible change over the two years could have bleached sometime after the initial survey and recovered prior to the second survey. However, there is an information deficit concerning the seasonal mortality regimes of corals in the central Saudi Arabian Red Sea, which is an important topic for further research.

Across the 13 taxa represented by at least ten colonies, three groups were significantly different and characterized by relatively high and low bleaching; however, in terms of mortality, four overlapping groups were identified. Although *Galaxea*, *Millepora*, *Lobophytum*, and Fungiidae presented more extreme values than these groups did for bleaching or mortality, no significant differences were detected, likely as a result of small sample sizes and unbalanced proportions. Furthermore, some taxa presented similar bleaching responses but significant differences in mortality (i.e., *Acropora* and *Porites*, and *Goniastrea* (columnar) and *Porites*). These findings highlight that patterns of taxa-specific tolerance may be different than those of resistance and underscore the importance of long-term monitoring to investigate both. While overall bleaching rates were lower during the 2010 and 2015 bleaching events in the central Red Sea, *Goniastrea*, *Porites*, *Acropora*, *Montipora*, and *Pocillopora* exhibited similar relative bleaching patterns in 2020 in this study [63,93]. The taxa that were least impacted during the 2020 bleaching event (winners) presented relatively high resistance to bleaching (*Pocillopora* and *Montipora*), relatively high rates of tolerance (*Porites*), or a combination of both (*Stylophora*). The taxa that were most impacted (losers) were those that presented a high incidence of bleaching, high complete mortality rates (≥20%), and/or little recovery (<20%), namely, *Acropora*, *Goniastrea*, *Sclerophytum*, and Xeniidae.

### Winners and losers: A fluid scenario

*Acropora* (traditionally a loser), *Porites* (winner) and *Montipora* (winner) fell into the expected bleaching categories based on the growth form and results of previous studies, although the sample size was relatively small for *Montipora*. *Porites*, for example, are mainly massive corals and actually exhibited enhanced calcification during and two years following the 2015 bleaching event in the Red Sea, demonstrating the ability to regulate calcifying fluids, which facilitates survival and growth during bleaching [149]. While *Montipora* was previously classified as a loser in the Maldives during the 1998 bleaching event [19,23,100–102], those colonies were generally plating, whereas the colonies in this study were predominantly encrusting, which also supports previous bleaching patterns. Importantly, *Porites* and *Montipora* presented the highest rates of tolerance, which highlights the need not only to quantify the extent of bleaching for these taxa but also to resurvey colonies postbleaching to understand mortality and recovery patterns. In addition, *Acropora* in this study was reported to be a loser, which corresponds to the results of previous studies [13,51,52,55]. Importantly, branching corals such as *Acropora* serve important ecological functions, such as providing food and habitat for other reef organisms, and a shift from branching to massive corals could lead to a loss in habitat type [32,47,63,102].

Other coral taxa, however, did not fall into the expected categories and were not aligned with previous patterns of bleaching. Very little is known about bleaching in soft corals in general, and while some studies have demonstrated that soft corals may monopolize large areas [68,150,151], the consequences of disturbances on communities are unclear. For example, during the 1998 global bleaching event, high rates of bleaching and mortality for *Lobophytum* and *Sclerophytum* were reported in Palau [81] and the Great Barrier Reef [80], whereas *Sclerophytum* was relatively resistant compared with *Lobophytum* in Okinawa [51]. However, during the 2020 bleaching event in the Red Sea, Xenidiidae and *Sclerophytum* presented high mortality rates and were classified as losers. Although Xenidiidae exhibited one of the highest rates of resistance, these colonies also presented one of the lowest rates of tolerance and highest rate of complete mortality, similar to the 1998 bleaching event in the Great Barrier Reef [68], suggesting that if bleaching of Xenidiidae occurs, there is little chance for recovery. In fact, only some octocorals exhibit weedy traits, whereas others have slower growth rates and fewer opportunistic characteristics [68,150]. This suggests that soft corals may not necessarily dominate following a bleaching event. Indeed, a high proportion of Xenidiidae exhibited no visible change in coloration over the study period in only one (Merulina Reef) of the seven sites surveyed in this study (Fig G in S1 Text). Similarly, the Rabigh Offshore site was the only site in which *Sclerophytum* did not exhibit mortality.

The relatively high rate of resistance in branching *Pocillopora* was also unexpected considering the tendency of branching corals to be more commonly affected by bleaching and bleaching-related mortality. During the 2010 and 2015 Red Sea bleaching events, inshore *Pocillopora* colonies were severely affected; however, the mid-shelf and offshore colonies were surprisingly resistant. As all the sites in this study were offshore, this does appear to be a pattern in the central Red Sea. Indeed, it has been shown that Red Sea *Pocillopora* actually has a high capacity to adjust photoprotective pathways in response to environmental conditions, which could suggest regional acclimatization [152,153] or support that Red Sea *Pocillopora* is genetically distinct within the Arabian Peninsula [154]. However, there have also been reports of relatively low rates of bleaching in *Pocillopora* colonies in Moorea, French Polynesia [155,156]. Nevertheless, it is important to note that although resistance was high in *Pocillopora*, these colonies also presented one of the lowest rates of tolerance, which suggests that, similar to Xenidiidae, once bleached, recovery may be limited. *Stylophora* colonies presented a complete mortality rate of <20%, and the majority of the colonies presented no visible change in coloration over the study period or recovered, although the sample size was relatively small. Importantly, the two most dominant branching corals typically considered susceptible to bleaching (*Acropora* and *Pocillopora*) differed significantly in both the bleaching pattern and mortality rate. These findings are in contrast with previous studies where branching corals were more susceptible to bleaching than massive forms [13,19,51,63,93,152,153], suggesting that this paradigm may not be universally applicable and potential exceptions under specific environmental conditions may warrant further research as previously suggested [157,158].

Both columnar and massive growth forms of *Goniastrea* fell into the loser category, with the massive form only marginally classified as such. Columnar colonies presented a high mortality rate, and while massive colonies presented a rate of complete mortality <20%, the incidence of bleaching was high, and the recovery rate was only 20%. During previous bleaching events in the Red Sea, *Goniastrea* had a relatively high prevalence of bleaching, and high mortality rates in *Goniastrea* were reported in the Maldives following a bleaching event [13,63,93]. The high rates of bleaching prevalence and mortality and low chance of recovery in massive *Goniastrea* both here and in these studies suggest that massive growth forms may not necessarily be less susceptible to bleaching events [13,19,51,63,93,152,153]. Furthermore, even though both massive and columnar *Goniastrea* fell into the loser category, the scenarios were quite different even within this single genus, which highlights the importance of further research at the species level. Overall, the unexpected and contradictory patterns found in octocorals, *Pocillopora*, and *Goniastrea* in this study highlight the need for a more nuanced examination of growth forms and bleaching patterns. Further research is also needed to understand whether these patterns are geographically unique to the central Red Sea.

### Coral reef ecosystem resilience

With bleaching predicted to become more frequent and severe under future climate change scenarios [23,28,32,121], thermally tolerant Red Sea corals may offer unique insights into coral reef ecosystem resilience. The northern Red Sea is currently considered a thermal refugium for corals and is connected with the central region [32,99,159,160]. As a result of the evolutionary history of Red Sea corals, the SST in the northern region is approximately 4 °C below the corals' thermal maxima, allowing them to withstand more intense albeit less frequent DHWs relative to those in the southern region [31,161]. For example, while mass bleaching has occurred in the southern and central Red Sea with major impacts previously discussed, the northern region has experienced only minor bleaching since 2007 [32,159,161]. In 2015 in particular, corals in the northern Red Sea did not bleach, despite experiencing greater than 8°C-weeks [159]. It has even been suggested that some Red Sea corals may be capable of long-term adaptation [31,63,93,102,152,153]. However, high mortality rates during recent bleaching events, including the 2020 event reported here, highlight that adaptation is limited [102] as previously suggested in the South China Sea as well [120]. Furthermore, the northern Red Sea refugium may eventually disappear because SST in the region has increased by 0.4–0.45 °C each decade over the past 30 years [32,161].

Assessing the overall resilience of central Red Sea reefs poses a challenge, in part owing to a general lack of data for previous bleaching events. First, both the intensity and duration of elevated temperatures and irradiance influence the severity of a bleaching event [38,39], and both *in situ* and remote sensing data in the region are often insufficient for comparisons of thermal stress across years. Indeed, although DHWs appeared higher in 2020 than in previous bleaching years, *in situ* data to ground-truth past events are lacking. Furthermore, as discussed earlier, previous studies focused on the extent of bleaching and short-term changes in benthic communities. The question then remains as to whether corals are adapting to these events. With long-term *in situ* temperature data, future research could model the relationships among thermal stress, bleaching and mortality patterns to understand the effects across multiple taxa and sites. A larger sample size per taxon would also enable future studies to model probabilities of bleaching and mortality in relation to other factors, such as colony size, energy stores, and symbiont communities. This would facilitate investigations of both resistance and tolerance across multiple spatial scales, providing a better understanding of ecosystem resilience in a changing climate.

### Conclusions

Although differential susceptibility of corals to bleaching – and to a lesser extent, associated mortality – has been examined across various temporal and spatial scales, mortality and survival years following a bleaching event in the Saudi Arabian Red Sea remains particularly understudied [92,93]. In this study, SfM methodology enabled high-resolution fate

tracking of individual coral colonies across a relatively large spatial scale. Here, we demonstrated that the 2020 bleaching event may have been the most severe on record in the central Red Sea at the time of this study. The taxa-specific responses highlight the important role of identity in bleaching dynamics and illustrates the need to consider both resistance and tolerance in bleaching susceptibility. Furthermore, this study raises the question of whether the general relationship between coral growth forms and bleaching susceptibility adequately captures the complexity observed across different taxa in the central Red Sea. Nevertheless, this phenomenon of winners and losers may lead to community shifts and a loss of structural complexity, which can have cascading impacts on the biodiversity of coral reefs [51,93,123] and is presently an area for further investigation. Overall, this study represents the longest-term change following a bleaching event in a historically data scarce region, however whether the reefs in this region exhibit significant resilience has yet to be determined.

## Supporting information

### **S1 Text. Supplemental methodology and figures.**

(DOCX)

### **S2 Dataset. Dataset.**

(XLSX)

## Acknowledgments

We would like to thank Dream Divers for their support at sea and KAUST Coastal and Marine core labs for providing technical support onboard. We would like to thank Dr. Tullia Terraneo for planning the 2020 expedition and Dr. Fabio Marchese for planning the 2022 expedition. We further appreciate Dr. Ivor Williams, Rhonda Suka, and Dr. Luis Silva for their collaboration in developing a standardized SfM field methodology and Brian Nieuwenhuis for statistical analysis support.

## Author contributions

**Conceptualization:** Natalie Dunn, Fabio Marchese, Francesca Benzoni.

**Data curation:** Natalie Dunn, Catherine S. McFadden, Laura Macrina, Marta Ezeta Watts, Megan K. B. Nolan, Francesca Giovenzana, Francesca Benzoni.

**Formal analysis:** Natalie Dunn.

**Funding acquisition:** Francesca Benzoni.

**Investigation:** Natalie Dunn, Francesca Benzoni.

**Methodology:** Natalie Dunn, Fabio Marchese, Francesca Benzoni.

**Project administration:** Natalie Dunn, Fabio Marchese, Francesca Benzoni.

**Resources:** Fabio Marchese, Catherine S. McFadden, Laura Macrina, Francesca Benzoni.

**Supervision:** Fabio Marchese, Francesca Benzoni.

**Validation:** Natalie Dunn, Fabio Marchese, Catherine S. McFadden, Laura Macrina, Francesca Benzoni.

**Visualization:** Natalie Dunn, Fabio Marchese, Francesca Benzoni.

**Writing – original draft:** Natalie Dunn.

**Writing – review & editing:** Natalie Dunn, Fabio Marchese, Catherine S. McFadden, Laura Macrina, Marta Ezeta Watts, Megan K. B. Nolan, Francesca Giovenzana, Francesca Benzoni.

## References

1. Jackson JB. Adaptation and diversity of reef corals. *BioScience*. 1991;475–82.
2. Bythell JC, Gladfelter EH, Bythell M. Chronic and catastrophic natural mortality of three common Caribbean reef corals. *Coral Reefs*. 1993;12(3–4):143–52. <https://doi.org/10.1007/bf00334474>
3. Connell JH, Hughes TP, Wallace CC. A 30-year study of coral abundance, recruitment, and disturbance at several scales in space and time. *Ecol Monogr*. 1997;67(4):461–88. [https://doi.org/10.1890/0012-9615\(1997\)067\[0461:aysoca\]2.0.co;2](https://doi.org/10.1890/0012-9615(1997)067[0461:aysoca]2.0.co;2)
4. Karlson RH. Dynamics of coral communities. Vol. 23. Springer Science & Business Media; 2002.
5. Langmead O, Sheppard C. Coral reef community dynamics and disturbance: a simulation model. *Ecol Modell*. 2004;175(3):271–90. <https://doi.org/10.1016/j.ecolmodel.2003.10.019>
6. Madin JS, Baird AH, Dornelas M, Connolly SR. Mechanical vulnerability explains size-dependent mortality of reef corals. *Ecol Lett*. 2014;17(8):1008–15. <https://doi.org/10.1111/ele.12306> PMID: 24894390
7. Pisapia C, Pratchett MS. Spatial variation in background mortality among dominant coral taxa on Australia's Great Barrier Reef. *PLoS One*. 2014;9(6):e100969. <https://doi.org/10.1371/journal.pone.0100969> PMID: 24959921
8. Smith H, Chen C, Pollock F, Re M, Willis B, Bourne D. Drivers of coral mortality in non-acute disturbance periods. *Mar Ecol Prog Ser*. 2023;717:37–50. <https://doi.org/10.3354/meps14362>
9. Hughes TP, Jackson JBC. Population dynamics and life histories of Foliose Corals. *Ecol Monogr*. 1985;55(2):141–66. <https://doi.org/10.2307/1942555>
10. Babcock RC. Comparative demography of three species of scleractinian corals using age-and size-dependent classifications. *Ecol Monogr*. 1991;61(3):225–44.
11. Baird A, Marshall P. Mortality, growth and reproduction in scleractinian corals following bleaching on the Great Barrier Reef. *Mar Ecol Prog Ser*. 2002;237:133–41. <https://doi.org/10.3354/meps237133>
12. McClanahan TR, Weil E, Cortés J, Baird AH, Ateweberhan M. Consequences of coral bleaching for sessile reef organisms. *Coral bleaching: patterns, processes, causes and consequences*. 2009. pp. 121–38.
13. Pisapia C, Burn D, Pratchett MS. Changes in the population and community structure of corals during recent disturbances (February 2016–October 2017) on Maldivian coral reefs. *Sci Rep*. 2019;9(1):8402. <https://doi.org/10.1038/s41598-019-44809-9> PMID: 31182730
14. Madin JS, Baird AH, Baskett ML, Connolly SR, Dornelas MA. Partitioning colony size variation into growth and partial mortality. *Biol Lett*. 2020;16(1):20190727. <https://doi.org/10.1098/rsbl.2019.0727> PMID: 31964264
15. Connell JH. Population ecology of reef-building corals. *Biology and Geology of Coral Reefs*. Vol. 2. Elsevier; 1973. pp. 205–45. <https://doi.org/10.1016/b978-0-12-395526-5.50015-8>
16. Bak RPM, Luckhurst BE. Constancy and change in coral reef habitats along depth gradients at Curaçao. *Oecologia*. 1980;47(2):145–55. <https://doi.org/10.1007/BF00346812> PMID: 28309463
17. Lirman D, Formel N, Schopmeyer S, Ault JS, Smith SG, Gilliam D, et al. Percent recent mortality (PRM) of stony corals as an ecological indicator of coral reef condition. *Ecol Indic*. 2014;44:120–7. <https://doi.org/10.1016/j.ecolind.2013.10.021>
18. Burn D, Matthews S, Pisapia C, Hoey A, Pratchett M. Changes in the incidence of coral injuries during mass bleaching across Australia's Coral Sea Marine Park. *Mar Ecol Prog Ser*. 2022;682:97–109. <https://doi.org/10.3354/meps13935>
19. Pisapia C, Anderson KD, Pratchett MS. Temporal consistency in background mortality of four dominant coral taxa along Australia's Great Barrier Reef. *Coral Reefs*. 2016;35(3):839–49. <https://doi.org/10.1007/s00338-016-1421-4>
20. Obura DO. Resilience and climate change: lessons from coral reefs and bleaching in the Western Indian Ocean. *Estuar Coast Shelf Sci*. 2005;63(3):353–72. <https://doi.org/10.1016/j.ecss.2004.11.010>
21. Hodgson G. A global assessment of human effects on coral reefs. *Mar Pollut Bull*. 1999;38(5):345–55. [https://doi.org/10.1016/S0025-326X\(99\)00002-8](https://doi.org/10.1016/S0025-326X(99)00002-8)
22. DeVantier L, Pilcher N. The status of coral reefs in Saudi Arabia. *Status of coral reefs of the world*. Townsville: Australian Institute of Marine Science; 2000.
23. Hoegh-Guldberg O. Climate change, coral bleaching and the future of the world's coral reefs. *Mar Freshwater Res*. 1999. <https://doi.org/10.1071/mf99078>
24. Hughes TP, Baird AH, Bellwood DR, Card M, Connolly SR, Folke C, et al. Climate change, human impacts, and the resilience of coral reefs. *Science*. 2003;301(5635):929–33. <https://doi.org/10.1126/science.1085046> PMID: 12920289
25. Bellwood DR, Hughes TP, Folke C, Nyström M. Confronting the coral reef crisis. *Nature*. 2004;429(6994):827–33. <https://doi.org/10.1038/nature02691> PMID: 15215854
26. Hoegh-Guldberg O, Mumby PJ, Hooten AJ, Steneck RS, Greenfield P, Gomez E, et al. Coral reefs under rapid climate change and ocean acidification. *Science*. 2007;318(5857):1737–42. <https://doi.org/10.1126/science.1152509> PMID: 18079392
27. Spalding MD, Brown BE. Warm-water coral reefs and climate change. *Science*. 2015;350(6262):769–71. <https://doi.org/10.1126/science.aad0349> PMID: 26564846

28. Oliver JK, Berkelmans R, Eakin CM. Coral bleaching in space and time. *Coral bleaching: patterns, processes, causes and consequences*. 2018. pp. 27–49.
29. Hansen J, Sato M, Ruedy R, Lo K, Lea DW, Medina-Elizade M. Global temperature change. *Proc Natl Acad Sci U S A*. 2006;103(39):14288–93. <https://doi.org/10.1073/pnas.0606291103> PMID: 17001018
30. Gleckler PJ, Santer BD, Domingues CM, Pierce DW, Barnett TP, Church JA, et al. Human-induced global ocean warming on multidecadal timescales. *Nat Clim Change* 2012;2(7): 524–9.
31. DeCarlo TM. The past century of coral bleaching in the Saudi Arabian central Red Sea. *PeerJ*. 2020;8:e10200. <https://doi.org/10.7717/peerj.10200> PMID: 33150088
32. Hammerman NM, Rodriguez-Ramirez A, Staples TL, DeCarlo TM, Saderne V, Roff G, et al. Variable response of Red Sea coral communities to recent disturbance events along a latitudinal gradient. *Mar Biol*. 2021;168(12). <https://doi.org/10.1007/s00227-021-03984-y>
33. Lee H, Calvin K, Dasgupta D, Krinner G, Mukherji A, Thorne P, et al. Climate change 2023: synthesis report. Contribution of working groups I, II and III to the sixth assessment report of the intergovernmental panel on climate change. The Australian National University; 2023.
34. Weis VM. Cellular mechanisms of Cnidarian bleaching: stress causes the collapse of symbiosis. *J Exp Biol*. 2008;211(Pt 19):3059–66. <https://doi.org/10.1242/jeb.009597> PMID: 18805804
35. Baird AH, Bhagooli R, Ralph PJ, Takahashi S. Coral bleaching: the role of the host. *Trends Ecol Evol*. 2009;24(1):16–20. <https://doi.org/10.1016/j.tree.2008.09.005> PMID: 19022522
36. Lesser MP. Coral Bleaching: Causes and Mechanisms. *Coral Reefs: An Ecosystem in Transition*. 2010. pp. 405–19.
37. Wooldridge SA. Breakdown of the coral-algae symbiosis: towards formalising a linkage between warm-water bleaching thresholds and the growth rate of the intracellular zooxanthellae. *Biogeosciences*. 2013;10(3):1647–58. <https://doi.org/10.5194/bg-10-1647-2013>
38. Jokiel PL, Coles SL. Response of Hawaiian and other Indo-Pacific reef corals to elevated temperature. *Coral Reefs*. 1990;8(4):155–62. <https://doi.org/10.1007/bf00265006>
39. Fitt W, Brown B, Warner M, Dunne R. Coral bleaching: interpretation of thermal tolerance limits and thermal thresholds in tropical corals. *Coral Reefs*. 2001;20(1):51–65. <https://doi.org/10.1007/s003380100146>
40. Baker AC, Cunning R. Coral “Bleaching” as a Generalized Stress Response to Environmental Disturbance. *Diseases of Coral*. 2015. pp. 396–409.
41. Ziegler M, Roik A, Röthig T, Wild C, Rådecker N, Bouwmeester J, et al. Ecophysiology of reef-building corals in the Red Sea. *Coral Reefs of the World*. Springer International Publishing. 2019. pp. 33–52. [https://doi.org/10.1007/978-3-030-05802-9\\_3](https://doi.org/10.1007/978-3-030-05802-9_3)
42. Baker AC, Glynn PW, Riegl B. Climate change and coral reef bleaching: An ecological assessment of long-term impacts, recovery trends and future outlook. *Estuar Coast Shelf Sci*. 2008;80(4):435–71. <https://doi.org/10.1016/j.ecss.2008.09.003>
43. Luckhurst BE, Luckhurst K. Analysis of the influence of substrate variables on coral reef fish communities. *Mar Biol*. 1978;49(4):317–23. <https://doi.org/10.1007/bf00455026>
44. Rogers CS, Suchanek TH, Pecora FA. Effects of hurricanes David and Frederic (1979) on shallow *Acropora palmata* reef communities: St. Croix, US Virgin Islands. *Bull Mar Sci*. 1982;32(2):532–48.
45. Fisher WS, Davis WP, Quarles RL, Patrick J, Campbell JG, Harris PS, et al. Characterizing coral condition using estimates of three-dimensional colony surface area. *Environ Monit Assess*. 2007;125(1–3):347–60. <https://doi.org/10.1007/s10661-006-9527-8> PMID: 17225074
46. Alvarez-Filip L, Dulvy NK, Gill JA, Côté IM, Watkinson AR. Flattening of Caribbean coral reefs: region-wide declines in architectural complexity. *Proc Biol Sci*. 2009;276(1669):3019–25. <https://doi.org/10.1098/rspb.2009.0339> PMID: 19515663
47. Burns J, Delparte D, Gates RD, Takabayashi M. Integrating structure-from-motion photogrammetry with geospatial software as a novel technique for quantifying 3D ecological characteristics of coral reefs. *PeerJ*. 2015;3:e1077. <https://doi.org/10.7717/peerj.1077> PMID: 26207190
48. Burns JHR, Delparte D, Kapono L, Belt M, Gates RD, Takabayashi M. Assessing the impact of acute disturbances on the structure and composition of a coral community using innovative 3D reconstruction techniques. *Methods Oceanogr*. 2016;15–16:49–59. <https://doi.org/10.1016/j.mio.2016.04.001>
49. Fitt WK, Spero HJ, Halas J, White MW, Porter JW. Recovery of the coral *Montastrea annularis* in the Florida Keys after the 1987 Caribbean “bleaching event” *Coral Reefs*. 1993;12(2):57–64. <https://doi.org/10.1007/bf00302102>
50. Ward S, Harrison P, Hoegh-Guldberg O. Coral bleaching reduces reproduction of scleractinian corals and increases susceptibility to future stress. In *Proceedings of the Ninth International Coral Reef Symposium, Bali, 23-27 October 2000*. Vol. 2. 2002. pp. 1123–8.
51. Loya Y, Sakai K, Yamazato K, Nakano Y, Sambali H, Van Woesik R. Coral bleaching: the winners and the losers. *Ecol Lett*. 2001;4(2):122–31.
52. van Woesik R, Sakai K, Ganase A, Loya Y. Revisiting the winners and the losers a decade after coral bleaching. *Mar Ecol Prog Ser*. 2011;434:67–76. <https://doi.org/10.3354/meps09203>
53. Magel JMT, Burns JHR, Gates RD, Baum JK. Effects of bleaching-associated mass coral mortality on reef structural complexity across a gradient of local disturbance. *Sci Rep*. 2019;9(1):2512. <https://doi.org/10.1038/s41598-018-37713-1> PMID: 30792432
54. Ferrari R, Bryson M, Bridge T, Hustache J, Williams SB, Byrne M, et al. Quantifying the response of structural complexity and community composition to environmental change in marine communities. *Glob Chang Biol*. 2016;22(5):1965–75. <https://doi.org/10.1111/gcb.13197> PMID: 26679689

55. Burt J, Al-Harathi S, Al-Cibahy A. Long-term impacts of coral bleaching events on the world's warmest reefs. *Mar Environ Res.* 2011;72(4):225–9. <https://doi.org/10.1016/j.marenvres.2011.08.005> PMID: [21880360](https://pubmed.ncbi.nlm.nih.gov/21880360/)
56. Darling ES, Alvarez-Filip L, Oliver TA, McClanahan TR, Côté IM, Bellwood D. Evaluating life-history strategies of reef corals from species traits. *Ecol Lett.* 2012;15(12):1378–86. <https://doi.org/10.1111/j.1461-0248.2012.01861.x> PMID: [22938190](https://pubmed.ncbi.nlm.nih.gov/22938190/)
57. Doherty ML, Johnson JV, Goodbody-Gringley G. Widespread coral bleaching and mass mortality during the 2023–2024 marine heatwave in Little Cayman. *PLoS One.* 2025;20(5):e0322636. <https://doi.org/10.1371/journal.pone.0322636> PMID: [40315251](https://pubmed.ncbi.nlm.nih.gov/40315251/)
58. Grottoli AG, Warner ME, Levas SJ, Aschaffenburg MD, Schoepf V, McGinley M, et al. The cumulative impact of annual coral bleaching can turn some coral species winners into losers. *Glob Chang Biol.* 2014;20(12):3823–33. <https://doi.org/10.1111/gcb.12658> PMID: [25044878](https://pubmed.ncbi.nlm.nih.gov/25044878/)
59. McClanahan T, Muthiga N, Mangi S. Coral and algal changes after the 1998 coral bleaching: interaction with reef management and herbivores on Kenyan reefs. *Coral Reefs.* 2001;19(4):380–91. <https://doi.org/10.1007/s003380000133>
60. Hughes TP, Kerry JT, Baird AH, Connolly SR, Dietzel A, Eakin CM, et al. Global warming transforms coral reef assemblages. *Nature.* 2018;556(7702):492–6. <https://doi.org/10.1038/s41586-018-0041-2> PMID: [29670282](https://pubmed.ncbi.nlm.nih.gov/29670282/)
61. Madin JS, Baird AH, Bridge TC, Connolly SR, Zawada KJ, Dornelas M. Cumulative effects of cyclones and bleaching on coral cover and species richness at Lizard Island. *Mar Ecol Prog Ser.* 2018;604:263–8.
62. Obura DO. Can differential bleaching and mortality among coral species offer useful indicators for assessment and management of reefs under stress? *Bull Mar Sci.* 2001;69(2):421–42.
63. Monroe AA, Ziegler M, Roik A, Röthig T, Hardenstine RS, Emms MA, et al. In situ observations of coral bleaching in the central Saudi Arabian Red Sea during the 2015/2016 global coral bleaching event. *PLoS One.* 2018;13(4):e0195814. <https://doi.org/10.1371/journal.pone.0195814> PMID: [29672556](https://pubmed.ncbi.nlm.nih.gov/29672556/)
64. Tkachenko KS, Hoang DT, Dang HN. Ecological status of coral reefs in the Spratly Islands, South China Sea (East sea) and its relation to thermal anomalies. *Estuar Coastal Shelf Sci.* 2020;238:106722. <https://doi.org/10.1016/j.ecss.2020.106722>
65. Guest JR, Baird AH, Maynard JA, Muttaqin E, Edwards AJ, Campbell SJ, et al. Contrasting patterns of coral bleaching susceptibility in 2010 suggest an adaptive response to thermal stress. *PLoS One.* 2012;7(3):e33353. <https://doi.org/10.1371/journal.pone.0033353> PMID: [22428027](https://pubmed.ncbi.nlm.nih.gov/22428027/)
66. Guest JR, Low J, Tun K, Wilson B, Ng C, Raingeard D, et al. Coral community response to bleaching on a highly disturbed reef. *Sci Rep.* 2016;6:20717. <https://doi.org/10.1038/srep20717> PMID: [26876092](https://pubmed.ncbi.nlm.nih.gov/26876092/)
67. Endean R, Cameron AM, DeVantier LM. *Acanthaster planci* predation on massive corals: the myth of rapid recovery of devastated reefs. In *Proc 6<sup>th</sup> Int Coral Reef Symp Vol. 2.* 1988. pp. 143–8.
68. Fabricius KE. Reef invasion by soft corals: which taxa and which habitats. In *Proceedings of the Australian Coral Reef Society 75th Anniversary Conference.* Greenwood JG, Hall NJ, editors. 1998. pp. 77–90.
69. Norström A, Nyström M, Lokrantz J, Folke C. Alternative states on coral reefs: beyond coral–macroalgal phase shifts. *Mar Ecol Prog Ser.* 2009;376:295–306. <https://doi.org/10.3354/meps07815>
70. Johns KA, Osborne KO, Logan M. Contrasting rates of coral recovery and reassembly in coral communities on the Great Barrier Reef. *Coral Reefs.* 2014;33(3):553–63. <https://doi.org/10.1007/s00338-014-1148-z>
71. Lalas JAA, Jamodiong EA, Reimer JD. Spatial patterns of soft coral (Octocorallia) assemblages in the shallow coral reefs of Okinawa Island, Ryukyu Archipelago, Japan: dominance on highly disturbed reefs. *Reg Stud Mar Sci.* 2024;71:103405.
72. Tkachenko KS, Dung VV, Ha VT. Phase shift from a stony-coral to a soft-coral community on a coral reef: a case study of an alternative state. *Mar Biol Res.* 2022;18(9–10):544–54. <https://doi.org/10.1080/17451000.2022.2153869>
73. Work TM, Aeby GS, Maragos JE. Phase shift from a coral to a corallimorph-dominated reef associated with a shipwreck on Palmyra atoll. *PLoS One.* 2008;3(8):e2989. <https://doi.org/10.1371/journal.pone.0002989> PMID: [18714355](https://pubmed.ncbi.nlm.nih.gov/18714355/)
74. Kuguru BL, Mgaya YD, Ohman MC, Wagner GM. The reef environment and competitive success in the Corallimorpharia. *Mar Biol.* 2004;145(5):875–84. <https://doi.org/10.1007/s00227-004-1376-9>
75. Sammarco PW, Coll JC, La Barre S. Competitive strategies of soft corals (Coelenterata: Octocorallia). II. Variable defensive responses and susceptibility to scleractinian corals. *J Exp Mar Biol Ecol.* 1985;91(3):199–215. [https://doi.org/10.1016/0022-0981\(85\)90176-5](https://doi.org/10.1016/0022-0981(85)90176-5)
76. Maida M, Sammarco P, Coll J. Effects of soft corals on scleractinian coral recruitment. I: Directional allelopathy and inhibition of settlement. *Mar Ecol Prog Ser.* 1995;121:191–202. <https://doi.org/10.3354/meps121191>
77. Fox HE, Pet JS, Dahuri R, Caldwell RL. Recovery in rubble fields: long-term impacts of blast fishing. *Mar Pollut Bull.* 2003;46(8):1024–31. [https://doi.org/10.1016/S0025-326X\(03\)00246-7](https://doi.org/10.1016/S0025-326X(03)00246-7) PMID: [12907196](https://pubmed.ncbi.nlm.nih.gov/12907196/)
78. McFadden CS, Van Ofwegen LP, Quattrini AM. Revisionary systematics of Octocorallia (Cnidaria: Anthozoa) guided by phylogenomics. *Bull Soc Syst Biol.* 2022;1(3). <https://doi.org/10.18061/bssb.v1i3.8735>
79. Reverter M, Helber SB, Rohde S, de Goeij JM, Schupp PJ. Coral reef benthic community changes in the Anthropocene: Biogeographic heterogeneity, overlooked configurations, and methodology. *Glob Chang Biol.* 2022;28(6):1956–71. <https://doi.org/10.1111/gcb.16034> PMID: [34951504](https://pubmed.ncbi.nlm.nih.gov/34951504/)
80. Fabricius K. Tissue loss and mortality in soft corals following mass-bleaching. *Coral Reefs.* 1999;18(1):54–54. <https://doi.org/10.1007/s003380050153>

81. Bruno J, Siddon C, Witman J, Colin P, Toscano M. El Niño related coral bleaching in Palau, Western Caroline Islands. *Coral Reefs*. 2001;20(2):127–36. <https://doi.org/10.1007/s003380100151>
82. Bourne D, Iida Y, Uthicke S, Smith-Keune C. Changes in coral-associated microbial communities during a bleaching event. *ISME J*. 2008;2(4):350–63. <https://doi.org/10.1038/ismej.2007.112> PMID: 18059490
83. Claar DC, Starko S, Tietjen KL, Epstein HE, Cuning R, Cobb KM, et al. Dynamic symbioses reveal pathways to coral survival through prolonged heatwaves. *Nat Commun*. 2020;11(1):6097. <https://doi.org/10.1038/s41467-020-19169-y> PMID: 33293528
84. Ritson-Williams R, Gates RD. Coral community resilience to successive years of bleaching in Kāne'ohe Bay, Hawai'i. *Coral Reefs*. 2020;39(3):757–69. <https://doi.org/10.1007/s00338-020-01944-4>
85. Morais J, Morais RA, Tebbett SB, Pratchett MS, Bellwood DR. Dangerous demographics in post-bleach corals reveal boom-bust versus protracted declines. *Sci Rep*. 2021;11(1):18787. <https://doi.org/10.1038/s41598-021-98239-7> PMID: 34552159
86. McCarthy OS, Winston Pomeroy M, Smith JE. Corals that survive repeated thermal stress show signs of selection and acclimatization. *PLoS One*. 2024;19(7):e0303779. <https://doi.org/10.1371/journal.pone.0303779> PMID: 39083457
87. Fox MD, Carter AL, Edwards CB, Takeshita Y, Johnson MD, Petrovic V, et al. Limited coral mortality following acute thermal stress and widespread bleaching on Palmyra Atoll, central Pacific. *Coral Reefs*. 2019;38(4):701–12. <https://doi.org/10.1007/s00338-019-01796-7>
88. Suka R, Asbury M, Gray AE, Winston M, Oliver TTA, Couch CS. Processing photomosaic imagery of coral reefs using structure-from-motion standard operating procedures. 2019.
89. Sandin SA, Edwards CB, Pedersen NE, Petrovic V, Pavoni G, Alcantar E, et al. Considering the rates of growth in two taxa of coral across Pacific islands. *Adv Mar Biol*. 2020;87(1):167–91. <https://doi.org/10.1016/bs.amb.2020.08.006> PMID: 33293010
90. Couch C, Suka R, Oliver T, Lamirand M, Asbury M, Amir C. Comparing coral demographic surveys from in situ observations and Structure-from-Motion imagery shows low methodological bias. 2021.
91. Yadav S, Roach TN, McWilliam MJ, Caruso C, de Souza MR, Foley C. Fine-scale variability in coral bleaching and mortality during a marine heatwave. *Front Mar Sci*. 2023;10:1108365.
92. DeVantier L, Turak E, Al-Shaikh K, De'ath G. Coral communities of the central-northern Saudi Arabian Red Sea. *Fauna Arabia*. 2000;18:23–66.
93. Furby KA, Bouwmeester J, Berumen ML. Susceptibility of central Red Sea corals during a major bleaching event. *Coral Reefs*. 2013;32(2):505–13. <https://doi.org/10.1007/s00338-012-0998-5>
94. Bruckner A, Rowlands G, Riegl B, Purkis S, Williams A, Renaud P. Khaled bin Sultann Living Oceans Foundation Atlas of Saudi Arabian Red Sea Marine Habitats. Panoramic Press; 2012.
95. Obura D. The diversity and biogeography of Western Indian Ocean reef-building corals. *PLoS One*. 2012;7(9):e45013. <https://doi.org/10.1371/journal.pone.0045013>
96. DiBattista JD, Howard Choat J, Gaither MR, Hobbs JA, Lozano-Cortés DF, Myers RF, et al. On the origin of endemic species in the Red Sea. *J Biogeogr*. 2015;43(1):13–30. <https://doi.org/10.1111/jbi.12631>
97. DiBattista JD, Roberts MB, Bouwmeester J, Bowen BW, Coker DJ, Lozano-Cortés DF, et al. A review of contemporary patterns of endemism for shallow water reef fauna in the Red Sea. *J Biogeogr*. 2015;43(3):423–39. <https://doi.org/10.1111/jbi.12649>
98. Berumen ML, Voolstra CR, Daffonchio D, Agusti S, Aranda M, Irigoien X, et al. The Red Sea: Environmental Gradients Shape a Natural Laboratory in a Nascent Ocean. In: Voolstra C, Berumen M, editors. *Coral Reefs of the Red Sea*. Springer International Publishing; 2019. pp. 1–10. [https://doi.org/10.1007/978-3-030-05802-9\\_1](https://doi.org/10.1007/978-3-030-05802-9_1)
99. Berumen ML, Arrigoni R, Bouwmeester J, Terraneo TI, Benzoni F. Corals of the Red Sea. In: Voolstra C, Berumen M, editors. *Coral Reefs of the Red Sea*. Springer International Publishing; 2019. pp. 123–56. [https://doi.org/10.1007/978-3-030-05802-9\\_7](https://doi.org/10.1007/978-3-030-05802-9_7)
100. Goreau T, McClanahan T, Hayes R, Strong A. Conservation of coral reefs after the 1998 global bleaching event. *Conserv Biol*. 2000;14(1):5–15. <https://doi.org/10.1046/j.1523-1739.2000.00011.x>
101. Glynn PW, Maté JL, Baker AC, Calderón MO. Coral bleaching and mortality in Panama and Ecuador during the 1997–1998 El Niño–Southern Oscillation event: spatial/temporal patterns and comparisons with the 1982–1983 event. *Bull Mar Sci*. 2001;69(1):79–109.
102. D'Olivo JP, Georgiou L, Falter J, DeCarlo TM, Irigoien X, Voolstra CR, et al. Long-Term Impacts of the 1997–1998 Bleaching Event on the Growth and Resilience of Massive *Porites* Corals From the Central Red Sea. *Geochem Geophys Geosyst*. 2019;20(6):2936–54. <https://doi.org/10.1029/2019gc008312>
103. Liu G, Strong AE, Skirving W. Remote sensing of sea surface temperatures during 2002 Barrier Reef coral bleaching. *EoS Transactions*. 2003;84(15):137–41. <https://doi.org/10.1029/2003eo150001>
104. NOAA Coral Reef Watch updated daily NOAA Coral Reef Watch Version 3.1 Daily Global 5km Satellite Coral Bleaching Degree Heating Week Product, Oct. 1, 1998–Oct. 31, 1998. College Park, Maryland, USA: NOAA Coral Reef Watch. 2018. [cited 2023 Apr 1]. <ftp://ftp.star.nesdis.noaa.gov/pub/sod/mech/crw/data/5km/v3.1/nc/v1.0/daily/dhw/>
105. Heron SF, Maynard JA, van Hooedonk R, Eakin CM. Warming Trends and Bleaching Stress of the World's Coral Reefs 1985–2012. *Sci Rep*. 2016;6:38402. <https://doi.org/10.1038/srep38402> PMID: 27922080
106. Skirving WJ, Heron SF, Marsh BL, Liu G, De La Cour JL, Geiger EF, et al. The relentless march of mass coral bleaching: a global perspective of changing heat stress. *Coral Reefs*. 2019;38(4):547–57. <https://doi.org/10.1007/s00338-019-01799-4>

107. NOAA Coral Reef Watch updated daily NOAA Coral Reef Watch Version 3.1 Daily Global 5km Satellite Coral Bleaching Degree Heating Week Product, Oct. 1, 2010–Oct. 31, 2010. College Park, Maryland, USA: NOAA Coral Reef Watch. 2018. [cited 2023 Apr 1]. <ftp://ftp.star.nesdis.noaa.gov/pub/sod/mecb/crw/data/5km/v3.1/nc/v1.0/daily/dhw/>
108. Hughes TP, Kerry JT, Álvarez-Noriega M, Álvarez-Romero JG, Anderson KD, Baird AH, et al. Global warming and recurrent mass bleaching of corals. *Nature*. 2017;543(7645):373–7. <https://doi.org/10.1038/nature21707> PMID: 28300113
109. Eakin CM, Sweatman HPA, Brainard RE. The 2014–2017 global-scale coral bleaching event: insights and impacts. *Coral Reefs*. 2019;38(4):539–45. <https://doi.org/10.1007/s00338-019-01844-2>
110. NOAA Coral Reef Watch updated daily NOAA Coral Reef Watch Version 3.1 Daily Global 5km Satellite Coral Bleaching Degree Heating Week Product, Oct. 1, 2015–Oct. 31, 2015. College Park, Maryland, USA: NOAA Coral Reef Watch. 2018. [cited 2023 Apr 1]. <ftp://ftp.star.nesdis.noaa.gov/pub/sod/mecb/crw/data/5km/v3.1/nc/v1.0/daily/dhw/>
111. NOAA Coral Reef Watch updated daily NOAA Coral Reef Watch Version 3.1 Daily Global 5km Satellite Coral Bleaching Alert Area, Jan. 1, 2020–Dec. 31, 2020. College Park, Maryland, USA: NOAA Coral Reef Watch. 2018. [cited 2023 Apr 1]. <ftp://ftp.star.nesdis.noaa.gov/pub/sod/mecb/crw/data/5km/v3.1/nc/v1.0/daily/dhw/>
112. NOAA Coral Reef Watch updated daily NOAA Coral Reef Watch Version 3.1 Daily Global 5km Satellite Coral Bleaching Degree Heating Week Product, Oct. 1, 2020–Oct. 31, 2020. College Park, Maryland, USA: NOAA Coral Reef Watch. 2018. [cited 2023 May 1]. <ftp://ftp.star.nesdis.noaa.gov/pub/sod/mecb/crw/data/5km/v3.1/nc/v1.0/daily/dhw/>
113. Zhu W, Xia J, Ren Y, Xie M, Yin H, Liu X, et al. Coastal corals during heat stress and eutrophication: A case study in Northwest Hainan coastal areas. *Mar Pollut Bull*. 2021;173(Pt B):113048. <https://doi.org/10.1016/j.marpolbul.2021.113048> PMID: 34678546
114. Benthuyssen JA, Smith GA, Spillman CM, Steinberg CR. Subseasonal prediction of the 2020 Great Barrier Reef and Coral Sea marine heatwave. *Environ Res Lett*. 2021;16(12):124050. <https://doi.org/10.1088/1748-9326/ac3aa1>
115. Hughes TP, Kerry JT, Connolly SR, Álvarez-Romero JG, Eakin CM, Heron SF, et al. Emergent properties in the responses of tropical corals to recurrent climate extremes. *Curr Biol*. 2021;31(23):5393–5399.e3. <https://doi.org/10.1016/j.cub.2021.10.046> PMID: 34739821
116. Nolan MKB, Schmidt-Roach S, Davis AR, Aranda M, Howells EJ. Widespread bleaching in the One Tree Island lagoon (Southern Great Barrier Reef) during record-breaking temperatures in 2020. *Environ Monit Assess*. 2021;193(9):590. <https://doi.org/10.1007/s10661-021-09330-5> PMID: 34417871
117. Page CA, Giuliano C, Bay LK, Randall CJ. High survival following bleaching highlights the resilience of a highly disturbed region of the Great Barrier Reef. *bioRxiv*. 2021.
118. National Oceanic and Atmospheric Administration (NOAA). NOAA Coral Reef Watch: Global coral bleaching event status report [Internet]. Silver Spring (MD): NOAA Coral Reef Watch; 2024 [cited 2025 Jul 21]. Available from: [https://www.coralreefwatch.noaa.gov/satellite/research/coral\\_bleaching\\_report.php](https://www.coralreefwatch.noaa.gov/satellite/research/coral_bleaching_report.php)
119. SHAMS Red Sea- Coral bleaching alert 27 October 2024. 2024. <https://shams.gov.sa/coral-reefs-what-is-shams-doing/>
120. Tkachenko KS, Dung VV, Ha VT, Phong HH. Unprecedented coral bleaching in Southern Vietnam in 2024: the only hope for thermal refuges? *Coral Reefs*. 2025;44(3):881–94. <https://doi.org/10.1007/s00338-025-02651-8>
121. Logan CA, Dunne JP, Eakin CM, Donner SD. Incorporating adaptive responses into future projections of coral bleaching. *Glob Chang Biol*. 2014;20(1):125–39. <https://doi.org/10.1111/gcb.12390> PMID: 24038982
122. Fukunaga A, Burns JHR, Pascoe KH, Kosaki RK. Associations between Benthic Cover and Habitat Complexity Metrics Obtained from 3D Reconstruction of Coral Reefs at Different Resolutions. *Remote Sens*. 2020;12(6):1011. <https://doi.org/10.3390/rs12061011>
123. Fukunaga A, Kosaki RK, Pascoe KH, Burns JHR. Fish Assemblage Structure in the Northwestern Hawaiian Islands Is Associated with the Architectural Complexity of Coral-Reef Habitats. *Diversity*. 2020;12(11):430. <https://doi.org/10.3390/d12110430>
124. Ellis J, Anlauf H, Kürten S, Lozano-Cortés D, Alsaffar Z, Cúrdia J, et al. Cross shelf benthic biodiversity patterns in the Southern Red Sea. *Sci Rep*. 2017;7(1):437. <https://doi.org/10.1038/s41598-017-00507-y> PMID: 28348406
125. Sheppard CR, Sheppard ALS. Corals and Coral Communities of Arabia. In: Buttiker W, Krupp F, editors. *Fauna of Saudi Arabia*. Vol. 12. Basle: Natural History Museum. 1991. pp. 3–170.
126. AgiSoft Metashape Professional (Version 2.0) (Software). 2023. Available from: <http://www.agisoft.com/downloads/installer/>
127. JPL MUR MEaSUREs Project 2015 GHRST Level 4 MUR Global Foundation Sea Surface Temperature Analysis. Ver. 4.1. PO.DAAC, CA, USA. [cited 2023 Sep 23] <https://doi.org/10.5067/GHGMR-4FJ04>
128. Wilcoxon F. Individual Comparisons by Ranking Methods. *Biometrics Bull*. 1945;1(6):80. <https://doi.org/10.2307/3001968>
129. Red Sea Global. Wildlife and ecosystems report [Internet]. Riyadh: Red Sea Global; 2023 [cited 2025 Jul 24]. Available from: <https://www.redsea-global.com/en/responsible-development/wildlife-and-ecosystems/>
130. ESRI. ArcGIS Desktop: Release 10.8.2. Redlands, CA: Environmental Systems Research Institute; 2019.
131. Skirving W, Marsh B, De La Cour J, Liu G, Harris A, Maturi E, et al. CoralTemp and the Coral Reef Watch Coral Bleaching Heat Stress Product Suite Version 3.1. *Remote Sens*. 2020;12(23):3856. <https://doi.org/10.3390/rs12233856>
132. R Core Team. R: A language and environment for statistical computing. R Foundation for Statistical Computing, Vienna, Austria. 2022. <https://www.R-project.org/>
133. Peduzzi P, Concato J, Kemper E, Holford TR, Feinstein AR. A simulation study of the number of events per variable in logistic regression analysis. *J Clin Epidemiol*. 1996;49(12):1373–9. [https://doi.org/10.1016/s0895-4356\(96\)00236-3](https://doi.org/10.1016/s0895-4356(96)00236-3) PMID: 8970487

134. Hothorn T, Bretz F, Westfall P. Simultaneous inference in general parametric models. *Biom J.* 2008;50(3):346–63. <https://doi.org/10.1002/bimj.200810425> PMID: [18481363](https://pubmed.ncbi.nlm.nih.gov/18481363/)
135. Oksanen J, Simpson G, Blanchet F, Kindt R, Legendre P, Minchin P, et al. *vegan: Community Ecology Package*. R package version 2.6-4. 2022. <https://CRAN.Rproject.org/package=vegan>
136. Marshall P, Schuttenberg H. *Reef Manager's Guide to Coral Bleaching*. 2007.
137. Hughes TP, Rodrigues MJ, Bellwood DR, Ceccarelli D, Hoegh-Guldberg O, McCook L, et al. Phase shifts, herbivory, and the resilience of coral reefs to climate change. *Curr Biol.* 2007;17(4):360–5. <https://doi.org/10.1016/j.cub.2006.12.049> PMID: [17291763](https://pubmed.ncbi.nlm.nih.gov/17291763/)
138. Agisoft Metashape. *Agisoft Metashape User Manual Standard Edition, Version 2.1*. 2024.
139. SHAMS Red Sea- Coral bleaching alert 27 October 2024. 2024. <https://shams.gov.sa/coral-reefs-what-is-shams-doing/>
140. Tietbohl M, Geneviev LGC, Krieger EC, Kattan A, Rodriguez Bravo LM, Palm L, et al. Extreme Marine Heatwave Linked to Mass Fish Kill in the Red Sea. 2024. <https://doi.org/10.2139/ssrn.4991878>
141. Spalding MD, Fox HE, Allen GR, Davidson N, Ferdaña ZA, Finlayson M, et al. Marine Ecoregions of the World: A Bioregionalization of Coastal and Shelf Areas. *BioScience.* 2007;57(7):573–83. <https://doi.org/10.1641/b570707>
142. Churchill J, Davis K, Wurgaft E, Shaked Y. Environmental setting for reef building in the Red Sea. In: Voolstra C, Berumen M, editors. *Coral Reefs of the Red Sea*. Springer International Publishing; 2019. pp. 11–32.
143. Raitsos DE, Pradhan Y, Brewin RJW, Stenchikov G, Hoteit I. Remote sensing the phytoplankton seasonal succession of the Red Sea. *PLoS One.* 2013;8(6):e64909. <https://doi.org/10.1371/journal.pone.0064909> PMID: [23755161](https://pubmed.ncbi.nlm.nih.gov/23755161/)
144. Roberts MB, Jones GP, McCormick MI, Munday PL, Neale S, Thorrold S, et al. Homogeneity of coral reef communities across 8 degrees of latitude in the Saudi Arabian Red Sea. *Mar Pollut Bull.* 2016;105(2):558–65. <https://doi.org/10.1016/j.marpolbul.2015.11.024> PMID: [26608504](https://pubmed.ncbi.nlm.nih.gov/26608504/)
145. Berumen ML, Roberts MB, Sinclair-Taylor TH, DiBattista JD, Saenz-Agudelo P, Isari S. Fishes and connectivity of Red Sea coral reefs. In: Voolstra C, Berumen M, editors. *Coral Reefs of the Red Sea*. Springer International Publishing; 2019. pp. 157–79.
146. Ellis JI, Jamil T, Anlauf H, Coker DJ, Curdia J, Hewitt J, et al. Multiple stressor effects on coral reef ecosystems. *Glob Chang Biol.* 2019;25(12):4131–46. <https://doi.org/10.1111/gcb.14819> PMID: [31482629](https://pubmed.ncbi.nlm.nih.gov/31482629/)
147. Goreau TJ, Macfarlane AH. Reduced growth rate of *Montastrea annularis* following the 1987?1988 coral-bleaching event. *Coral Reefs.* 1990;8(4):211–5. <https://doi.org/10.1007/bf00265013>
148. Drury C, Greer JB, Baums I, Gintert B, Lirman D. Clonal diversity impacts coral cover in *Acropora cervicornis* thickets: Potential relationships between density, growth, and polymorphisms. *Ecol Evol.* 2019;9(8):4518–31. <https://doi.org/10.1002/ece3.5035> PMID: [31031924](https://pubmed.ncbi.nlm.nih.gov/31031924/)
149. Mantanona HC, DeCarlo TM. Coral growth persistence amidst bleaching events. *Limnol Oceanogr Lett.* 2023;8(5):734–41.
150. Fabricius K. Slow population turnover in the soft coral genera *Sinularia* and *Sarcophyton* on mid- and outer-shelf reefs of the Great Barrier Reef. *Mar Ecol Prog Ser.* 1995;126:145–52. <https://doi.org/10.3354/meps126145>
151. Tilot V, Leujak W, Ormond RFG, Ashworth JA, Mabrouk A. Monitoring of South Sinai coral reefs: influence of natural and anthropogenic factors. *Aquatic Conservation.* 2008;18(7):1109–26. <https://doi.org/10.1002/aqc.942>
152. Sawall Y, Al-Sofyani A, Banguera-Hinestroza E, Voolstra CR. Spatio-temporal analyses of Symbiodinium physiology of the coral *Pocillopora verrucosa* along large-scale nutrient and temperature gradients in the Red Sea. *PLoS One.* 2014;9(8):e103179. <https://doi.org/10.1371/journal.pone.0103179> PMID: [25137123](https://pubmed.ncbi.nlm.nih.gov/25137123/)
153. Ziegler M, Roder C, Büchel C, Voolstra C. Niche acclimatization in Red Sea corals is dependent on flexibility of host-symbiont association. *Mar Ecol Prog Ser.* 2015;533:149–61. <https://doi.org/10.3354/meps11365>
154. Oury N, Berumen ML, Paulay G, Benzoni F. One species to rule them all: genomics sheds light on the *Pocillopora* species diversity and distinctiveness around the Arabian Peninsula. *Coral Reefs.* 2025;44(3):983–98. <https://doi.org/10.1007/s00338-025-02659-0>
155. Pratchett MS, Trapon M, Berumen ML, Chong-Seng K. Recent disturbances augment community shifts in coral assemblages in Moorea, French Polynesia. *Coral Reefs.* 2010;30(1):183–93. <https://doi.org/10.1007/s00338-010-0678-2>
156. Carroll AG, Harrison PL, Adjeroud M. Susceptibility of coral assemblages to successive bleaching events at Moorea, French Polynesia. *Mar Freshw Res.* 2016;68(4):760–71.
157. McClanahan TR. The relationship between bleaching and mortality of common corals. *Mar Biol.* 2004;144(6):1239–45. <https://doi.org/10.1007/s00227-003-1271-9>
158. McClanahan TR, Ateweberhan M, Graham NA, Wilson SK, Sebastian CR, Guillaume MM, et al. Western Indian Ocean coral communities: bleaching responses and susceptibility to extinction. *Mar Ecol Prog Ser.* 2007;337:1–3.
159. Osman EO, Smith DJ, Ziegler M, Kürten B, Conrad C, El-Haddad KM, et al. Thermal refugia against coral bleaching throughout the northern Red Sea. *Glob Chang Biol.* 2018;24(2):e474–84. <https://doi.org/10.1111/gcb.13895> PMID: [29044761](https://pubmed.ncbi.nlm.nih.gov/29044761/)
160. Fine M, Cinar M, Voolstra CR, Safa A, Rinkevich B, Laffoley D, et al. Coral reefs of the Red Sea—Challenges and potential solutions. *Reg Stud Mar Sci* 2019;25:100498.
161. Geneviev LGC, Jamil T, Raitsos DE, Krokos G, Hoteit I. Marine heatwaves reveal coral reef zones susceptible to bleaching in the Red Sea. *Glob Chang Biol.* 2019;25(7):2338–51. <https://doi.org/10.1111/gcb.14652> PMID: [30974020](https://pubmed.ncbi.nlm.nih.gov/30974020/)
